1     **The apical annuli of *Toxoplasma gondii* are composed of coiled-coil and signaling**  
2                                   **proteins embedded in the IMC sutures**

3

4     **Running title: Composition of the *Toxoplasma gondii* apical annuli**

5

6     Klemens Engelberg<sup>1</sup>, Chun-Ti Chen<sup>1,†</sup>, Tyler Bechtel<sup>2</sup>, Victoria Sánchez Guzmán<sup>1,3</sup>,

7     Allison A. Drozda<sup>1</sup>, Suyog Chavan<sup>1</sup>, Eranthie Weerapana<sup>2</sup>, Marc-Jan Gubbels<sup>1\*</sup>

8

9     <sup>1</sup>Department of Biology, Boston College, Chestnut Hill, Massachusetts, USA

10    <sup>2</sup>Department of Chemistry, Boston College, Chestnut Hill, Massachusetts, USA

11    <sup>3</sup>University of Puerto Rico, San Juan, Puerto Rico, USA

12

13    <sup>†</sup>present address: The First Affiliated Hospital of Xi'an Jiaotong University, Xi'an,

14    Shaanxi Province, China

15

16

17

18

19

20    \*Address correspondence to Marc-Jan Gubbels, [gubbelsj@bc.edu](mailto:gubbelsj@bc.edu)

21 **Abstract**

22 The apical annuli are among the most intriguing and understudied structures in the  
23 cytoskeleton of the apicomplexan parasite *Toxoplasma gondii*. We mapped the proteome  
24 of the annuli in *Toxoplasma* by reciprocal proximity biotinylation (BioID), and validated  
25 five apical annuli proteins (AAP1-5), Centrin2 and a methyltransferase (AAMT).  
26 Moreover, Inner Membrane Complex (IMC) suture proteins connecting the alveolar  
27 vesicles were also detected and support annuli residence within the sutures. Super-  
28 resolution microscopy (SR-SIM) identified a concentric organization comprising four  
29 rings with diameters ranging from 200-400 nm. The high prevalence of domain  
30 signatures shared with centrosomal proteins in the AAPs together with Centrin2 suggest  
31 that the annuli are related and/or derived from the centrosomes. Phylogenetic analysis  
32 revealed the AAPs are conserved narrowly in Coccidian, apicomplexan parasites that  
33 multiply by an internal budding mechanism. This suggests a role in replication, for  
34 example, to provide pores in the mother IMC permitting exchange of building blocks and  
35 waste products. However, presence of multiple signaling domains and proteins are  
36 suggestive of additional functions. Knockout of AAP4, the most conserved compound  
37 forming the largest ring-like structure, modestly decreased parasite fitness *in vitro* but  
38 had no significant impact on acute virulence *in vivo*. In conclusion, the apical annuli are  
39 composed of coiled-coil and signaling proteins assembled in a pore-like structure  
40 crossing the IMC barrier maintained during internal budding.

41

## 42 **Introduction**

43 Apicomplexan parasites are obligate intracellular parasites posing significant burdens  
44 on human health and livestock. These parasites have an elaborate cytoskeleton that plays  
45 key roles in their pathogenesis by facilitating invasion of their host cells as well as  
46 driving cell division. *Toxoplasma gondii*, which causes opportunistic and congenital  
47 diseases in humans, serves as an apicomplexan model for these aspects of pathogenesis  
48 (Gubbels & Morrissette, 2013, Anderson-White *et al.*, 2012, Chen *et al.*, 2015, Chen *et*  
49 *al.*, 2016). *Toxoplasma* develops by an internal budding process producing either two  
50 daughters in the intermediate host (endodyogeny in tachyzoites and bradyzoites), or up to  
51 eight daughters in the pre-sexual stages in the cat intestinal epithelium (endopolygeny in  
52 merozoites). Endodyogeny is driven by assembly of two nascent cortical cytoskeletons in  
53 the cytoplasm of a mother cell (Anderson-White *et al.*, 2012, Chen & Gubbels, 2013,  
54 Francia & Striepen, 2014, Nishi *et al.*, 2008, Goldman *et al.*, 1958). The cytoskeleton is  
55 composed of flattened vesicles known as alveoli organized in a quilt-pattern (Chen *et al.*,  
56 2016, Porchet & Torpier, 1977). On the cytoplasmic side the alveoli are supported by a  
57 meshwork of 10 nm filament forming proteins, which in turn are supported by a set of 22  
58 cortical microtubules running in a spiral pattern from the apex to 2/3 the length of the  
59 parasite. This structure is also known as the Inner Membrane Complex, and many of its  
60 protein components are known as IMC proteins (Anderson-White *et al.*, 2011, Chen *et al.*,  
61 2015, Chen *et al.*, 2016). The assembly of daughter parasite cytoskeletons nucleates at the  
62 centrosome outer core (Suvorova *et al.*, 2015) and progresses in an apical to basal  
63 direction throughout a 2-3 hr window in the 6.5 hr tachyzoite cell cycle (Nishi *et al.*,  
64 2008). The very apical end of the cytoskeleton is composed of a tubulin basket known as  
65 the conoid, which extrudes in a Ca<sup>2+</sup>-dependent fashion required for host cell invasion  
66 (Gonzalez Del Carmen *et al.*, 2009). A contractile ring at the basal end of the  
67 cytoskeleton known as the basal complex drives tapering of the nascent daughter  
68 cytoskeletons and in addition serves in maintaining a cytoplasmic bridge between divided  
69 parasites (Frenal *et al.*, 2017, Lorestani *et al.*, 2010).

70 One of the most intriguing structures in the *Toxoplasma* cytoskeleton comprises the  
71 apical annuli (aka peripheral annuli). The 5-6 annuli (meaning ring-shaped) were first  
72 observed with Centrin2 as ~200 nm diameter rings residing at the transition between the

73 single cap alveolus and the next more basal series of 5-6 alveolar vesicles (Hu *et al.*,  
74 2006). Centrin2 is a small protein containing 4 EF hand domains that has been suggested  
75 to form filaments that contract in a  $\text{Ca}^{2+}$ -dependent fashion (Hu, 2008). However,  
76 Centrin2 has multiple subcellular localizations: the centrosomes, the pre-conoidal ring, the  
77 apical annuli and the basal complex, and appears to fulfill several different functions in  
78 the parasite of which conoid localization was associated with microneme secretion  
79 (Lentini *et al.*, 2019). Recently, a protein was reported that only localizes to the annuli,  
80 Peripheral Annuli Protein 1 (PAP1), which is related to centrosomal proteins and harbors  
81 extensive coiled-coil regions (Suvorova *et al.*, 2015). Since the abbreviation PAP is more  
82 commonly used for Phosphatidic Acid Phosphatases, we renamed PAP1 to Apical Annuli  
83 Protein 1 (AAP1).

84 To further our understanding of the apical annuli in *Toxoplasma* we resolved its  
85 proteome using proximity-based biotinylation proteomics (Roux *et al.*, 2012). A total of  
86 seven proteins were identified as *bona fide* apical annuli residents. Five of these, dubbed  
87 AAP1-5, shared low complexity and coiled-coil regions, suggestive of structural  
88 functions in the annuli. The AAP proteins are assembled into several concentric rings  
89 with diameters ranging from 200-400 nm. Centrin2 resides in the intermediate ring  
90 whereas an apical annuli methyltransferase (AAMT) is only present on the annuli in  
91 intracellular tachyzoites. Furthermore, the *aap* genes are conserved in the genomes of  
92 Coccidia that divide by internal budding but are absent from other Apicomplexa, which  
93 suggests that the annuli somehow facilitate internal budding. Knockout of AAP4, the  
94 most conserved AAP, demonstrated that the annuli are critical for *in vitro* expansion but  
95 not for the acute stage in mice. Overall, our data identify a set of novel proteins  
96 exclusively localizing to the apical annuli in *Toxoplasma*, which reveal the complex  
97 architecture and dynamics of this cytoskeleton assembly as well as several parallel  
98 insights toward putative function.

99

## 100 **Results**

### 101 *1. The annuli proteome mapped by proximity-based biotinylation*

102 Proximity-based biotinylation is a powerful tool to analyze the protein composition of  
103 large complexes, in particular poorly soluble structures, such as the nuclear envelope

104 (Roux et al., 2012), nuclear pore complex (Kim *et al.*, 2014), centrosome (Firat-Karalar  
105 *et al.*, 2014, Gupta *et al.*, 2015), and the cytoskeleton of *Toxoplasma* (Chen et al., 2015,  
106 Chen et al., 2016, Long *et al.*, 2017a, Long *et al.*, 2017b). We tagged Centrin2 with the  
107 small promiscuous biotin ligase BioID2 (Kim *et al.*, 2016) to create a merodiploid Ty-  
108 BioID2 fusion protein expressing parasite line. The fusion protein displayed the expected  
109 localization and the corresponding biotinylation in these structures upon addition of  
110 extracellular biotin (Fig. 1A, Fig. S1A). Mass spectrometry analysis of the purified  
111 biotinylated proteins identified several proteins in known Centrin2 localizations,  
112 including the basal complex (e.g. MyosinJ) and the centrosome (Centrin1, Centrin3)  
113 (Table S1). However, most hits were annotated as hypothetical proteins. To increase the  
114 identification of specifically biotinylated proteins, we expressed a morn1-driven BioID2-  
115 YFP construct in the cytoplasm of control parasites (Fig. S1B, C) and generated samples  
116 grown in absence of biotin for all used cell lines. We then calculated the normalized  
117 spectral abundance factor (NSAF) (Florens *et al.*, 2006) for all recovered proteins, to  
118 correct for overrepresentation of large proteins. By comparing rank-ordered proteins of  
119 the Centrin2 data set to the cytosolic control, we identified TGGT1\_230340 with the  
120 greatest NSAF for a hypothetical protein in the Centrin2 data (Fig. S1D). We  
121 endogenously tagged TGGT1\_230340 with a Myc-epitope tag and observed a signal  
122 towards the apical end of the parasite. TGGT1\_230340 focused in 5-6 puncta around the  
123 apical cap, as judged by co-staining with  $\beta$ -tubulin (Fig. 1B). Co-localization with Ty-  
124 tagged Centrin2 confirmed the localization of TGGT1\_230340 at the apical annuli (Fig.  
125 1C).

126 To gain further insights into the enigmatic apical annuli we reciprocally tagged this  
127 new apical annuli protein, dubbed AAP4, with BioID2 on the N-terminus. To achieve this  
128 we utilized the selection-linked integration (SLI) strategy previously developed in  
129 *Plasmodium falciparum* (Birnbaum *et al.*, 2017). We inserted the HXGPRT selectable  
130 marker linked to Ty-BioID2 by a T2A skip-peptide at the 5' end of the endogenous *aap4*  
131 ORF (Fig. S1E). This line showed the previously observed subcellular localization for  
132 AAP4 and showed increased biotinylation upon BioID activation (Fig. 1D, Fig. S1F).

133 Upon mass spectrometry and further analysis with SAINTexpress software (Teo *et*  
134 *al.*, 2014), nearly 1/3 of the proteins in the AAP4 BioID2 data set were known to localize

135 to various aspects of the IMC. Notably transversal suture components (TSC) 1 and 3 and  
136 IMC suture component (ISC) 2 and 6 (Chen et al., 2015, Chen et al., 2016) stand out (Fig.  
137 1E). However, the largest number of the proteins specific to AAP4 were annotated as  
138 hypothetical (Table S1).

139 We used the mass spectrometry data of both Centrin2 and AAP4 BioID experiments  
140 to assemble a protein-protein interaction (PPI) network. Subsequently this data set was  
141 analyzed for probabilistic bait-prey interactions that have an AvgP (average individual  
142 probability for SAINT analysis)  $\geq 0.5$  (Fig. 1E) (Choi *et al.*, 2011, Lambert *et al.*, 2015).  
143 Several proteins are shared between the Centrin2 and AAP4 data sets, of which the  
144 following localized exclusively to the apical annuli: AAP1 (TGGT1\_242790) previously  
145 identified in (Suvorova et al., 2015); AAP3 (TGGT1\_313480); and AAP5  
146 (TGGT1\_319900) (Fig 2A). A fourth shared protein is annotated as a putative  
147 methyltransferase (TGGT1\_310070) that we named apical annuli methyltransferase  
148 (AAMT). A fifth, hypothetical protein (TGGT1\_242780) shared between Centrin2 and  
149 AAP4 is reminiscent of a translation-related factor and we considered it a non-specific hit.  
150 To statistically support our observations we visualized the analysis with a dot plot that  
151 highlighted the SAINTexpress readout. This dot plot is composed out of the AvgP, the  
152 relative protein abundance of a given protein seen in the respective BioID experiment and  
153 the sum of detected spectral counts (SpecSum) of that protein obtained in all individual  
154 replicates (Fig 1F).

155 This highlighted an additional protein shared between the two data sets, AAP2  
156 (TGGT1\_295850), which upon validation also localizes to the annuli (Fig. 2A). However,  
157 the statistical support in the AAP4 sample is very low, in contrast to its robust signal in  
158 the Centrin2 data. Furthermore in this dot plot, AAP4 appears to be relatively poorly  
159 represented in the Centrin2 data set. This representation is skewed by the extremely high  
160 peptide counts of AAP4 in the AAP4 sample itself, resulting in a relatively low  
161 abundance in the Centrin2 sample in this comparative representation. Absolute numbers  
162 put AAP4 in the top 3 of overall identified proteins in the Centrin2 sample. Reciprocally,  
163 the AAP4 sample revealed proteins found in the IMC sutures that are of relatively low  
164 abundance in the Centrin2 sample. This indicated that the annuli might be embedded in  
165 the IMC sutures. We further used the data to assemble a prey-prey correlation heat map

166 of the interactions (Fig. 1G). This identified several clusters of annuli and suture proteins  
167 that overlapped with each other. For example, identical behavior is suggested for AAP2  
168 and AAP3, which could indicate a coupled function. This further closely resembles the  
169 AAP5 pattern, suggesting a close proximity of these three proteins in the parasite.  
170 Likewise, AAP1, TSC1, and TSC3 appear to be closely associated, whereas AAP1  
171 connects to the AAP2/3/5 complex. Centrin2 and AAP4 appear to sit slightly apart (likely  
172 due to their skewed abundance in the data set as they were used as baits) but seem to be  
173 closer to the AAP2/3 complex than to the AAP1/TSC1/3 complex. Thus, these data  
174 provide a tentative architectural layout of the annuli and how they interface with the IMC  
175 sutures.

176

## 177 *2. Experimental validation of AAP proteins predicted by PPI analysis.*

178 We validated the BioID2-analysis based AAP annotation for the AAP2-5 genes by  
179 tagging the 3'-end of the endogenous loci with a triple Myc-epitope tag (Myc<sub>3</sub>) and  
180 immunofluorescence assays (Fig. 2, Fig. S2A, B). We observed apical annuli localization  
181 for all AAP proteins as judged by co-staining with an AAP4 antiserum that we generated  
182 (Fig. 2A). In addition we tagged the previously identified AAP1 (Suvorova et al., 2015)  
183 with a triple Myc epitope tag using the SLI system at the 3'end (Fig. S2C). We observed  
184 differences in signal intensity between mother and daughter buds for the different AAPs  
185 (Fig. 2B). By relative intensity to the mother, AAP5 is most enriched in the daughters  
186 followed in sequence of diminishing intensity by AAP1, AAP3, AAP4 and AAP2. These  
187 data correspond to observations of Centrin2, which was reported to be present in the  
188 annuli when the daughter cytoskeleton is being assembled (Hu et al., 2006). Our data  
189 expand on this observation by suggesting a putative hierarchical protein assembly of the  
190 annuli. We did not observe comparable changes in annuli association of AAP1-4 in  
191 extracellular parasites, except for AAP5, for which the signal sharply reduced in intensity  
192 (Fig. 2C).

193

## 194 *3. The AAPs are pluriform coiled-coil domain containing proteins*

195 We queried ToxoDB and performed other database searches to reveal functional  
196 features in the primary sequences of the AAPs. The AAPs are of a variety of size, domain



197 composition and phosphorylation status in the tachyzoite phosphoproteome (Treeck *et al.*,  
198 2011) (Fig. 3A-C). We identified coiled-coil regions as previously reported for AAP1  
199 (Suvorova *et al.*, 2015) in all of them except AAP5. AAP5 contained no recognizable  
200 domain features except an  $\alpha$ -helix-rich region. The presence of coiled regions however,  
201 appears to be the most shared feature across the AAPs. AAP1 was first described as  
202 centrosomal CEP250-related protein of approximately 200 kDa protein (Suvorova *et al.*,  
203 2015). AAP1 stands out from the other AAPs in that no phosphorylation sites were  
204 detected. A Histidine kinases, Adenyl cyclases, Methyl-accepting proteins and  
205 Phosphatases (HAMP) linker domain is present in the center of AAP1 (Fig. 3B). In  
206 bacteria, HAMP linkers are transmembrane two-component sensors that form dimers  
207 composed of four-helical bundles and can exist in two conformations to transduce signals  
208 (Bhate *et al.*, 2015). In fungi, HAMP domains are critical in histidine kinases of fungicide  
209 targets as well as have been shown to function in osmo-sensing (Defosse *et al.*, 2015,  
210 Meena *et al.*, 2010). However, the *Toxoplasma* kinome neither contains any predicted  
211 histidine kinase (Peixoto *et al.*, 2010) nor does AAP1 contain a transmembrane domain,  
212 thus suggesting a function distinct from the well-characterized, HAMP domain  
213 containing systems. Furthermore, detailed analysis of AAP1's coiled-coil region  
214 identified 11 repeats of a 33 amino acid sequence (Fig. 3B, D). Stretches of K and E  
215 residues make this a highly charged repeat. The repeats are predicted to form  $\alpha$ -helical  
216 coiled-coils interspersed by a short linker region (Fig. 3B). Similar highly charged repeats  
217 are found in three axoneme-associated protein mst101(1-3) of *Drosophila hydei* (Neesen  
218 *et al.*, 1999, Neesen *et al.*, 1994). The 16 amino acid repeats in DhMst101 also contain  
219 regularly spaced cysteine-residues that are expected to form long alpha-helical rods  
220 cross-linked by numerous Cys-Cys bridges. Dhmst101 proteins are part of the outer  
221 sheath of the sperm tail where they presumably help to provide a tight but elastic  
222 envelope for the extremely extended (20 mm) spermatozoa of *D. hydei*. However, Cys  
223 residues are not present in AAP1 suggesting the putative rods formed by this repeat are  
224 not cross-linked.

225 Using the annotated apicomplexan genomes assembled on EuPathDB (Aurrecochea  
226 *et al.*, 2013) and OrthoMCL (Chen *et al.*, 2006) databases we determined the AAP gene  
227 conservation across the Apicomplexa. Gene orthologous to AAP1-5 were easily found in



228 the closest relatives of *Toxoplasma*, *Hammondia hammondi* and *Neospora caninum* (Fig  
229 3D). The AAP1 orthologs in *Hammondia hammondi* and *Neospora caninum* both contain  
230 very synonymous charged repeats though the number of repeats is 10 in NcAAP1 and 8  
231 in HhAAP1 (Fig. 3D, Fig. S3). AAP1 is poorly conserved beyond these close relatives as  
232 a robust ortholog is not detectable in the next closest relatives *Sarcocystis neurona* and  
233 *Cystoisospora suis*.

234 AAP2 is the largest of the AAP proteins with a predicted mass of 331 kDa. Sequence  
235 analysis revealed two C-terminal cyclic nucleotide (cNMP) binding domains (Fig. 3A).  
236 In addition, the center of the protein harbors a coiled-coil domain, which presented weak  
237 homology to a variety of coiled-coil domains found in Structural Maintenance of  
238 Chromosomes (SMC) proteins as well as to a protein known as Rabaptin. Rabaptin is a  
239 coiled-coil protein that interacts with Rab5 and functions in endosomal vesicle recycling  
240 by facilitating membrane docking and fusion (Stenmark *et al.*, 1995, Deneka *et al.*, 2003).  
241 Seventy-three phosphorylated residues were detected in the AAP2 phosphoproteome,  
242 which aggregate in 2-3 clusters outside the recognizable functional domains (Fig. 3A).  
243 Across the Apicomplexa AAP2 stands out with homology found in *E. tenella* (1819 aa)  
244 sharing the coiled helix domain and the cNMP binding domains, but this protein is  
245 otherwise not homologous, not syntenically organized in the genome and might have  
246 evolved fast potentially toward a different function. The protein with the highest AAP2 e-  
247 value BLASTP in the *S. neurona* is nearly twice the size (3658 aa) and does not contain  
248 the cNMP binding domains, which could be due to a misannotation as it is syntenically  
249 organized in the genome (Fig. 3D).

250 AAP3 is predicted to be 152 kDa and harbors a series of coiled-coil domains, which  
251 displayed weak and likely random homology to SMC proteins (Fig. 3A). In addition, 15  
252 phosphorylated residues were detected in the tachyzoite phosphoproteome (Fig. 3B). One  
253 clear ortholog is present in *S. neurona* and *C. suis*, but not present in *E. tenella* (Fig 3D).

254 AAP4 is the smallest AAP protein with a predicted molecular weight of 102 kDa  
255 containing 26 detected phosphorylation sites, seven of which are clustered in the C-  
256 terminus whereas the others are located in the N-terminal half (Fig. 3A, B). A series of  
257 coiled-coil domains make up the central parts of the protein and display some tentative  
258 homology to an Armadillo-like domain (ARM) as well as the coiled-coil tail of myosin

259 heavy chains, suggestive of a structural function. Furthermore, toward the N-terminus a  
260 domain with homology to the GGN superfamily is present. GGNs or gametogenetins, are  
261 present in mammalian sperm cells, membrane associated, and have likely function in  
262 vesicular trafficking toward sperm maturation (Lu & Bishop, 2003, Zhao *et al.*, 2005).  
263 Thus, the domains present in AAP4 provide a hint toward a potential role in membrane  
264 trafficking for the apical annuli. AAP4 is by far the strongest conserved AAP protein  
265 across the Apicomplexa as a putative ortholog is even detected in *Plasmodium*  
266 *falciparum* (Fig. 3D).

267 The predicted AAP5 protein size is 265 kDa in which no specific domain features  
268 could be detected at all except a centrally located section almost exclusively composed of  
269 an  $\alpha$ -helix. The tachyzoite phosphoproteome reported 36 phosphorylation sites on AAP5.  
270

#### 271 *4. A methyltransferase resides on the apical annuli in intracellular tachyzoites*

272 To validate the localization of the methyltransferase AAMT, identified by our PPI  
273 network in Figure 1 E-G, we tagged the endogenous locus with a triple Myc-epitope tag  
274 (Myc<sub>3</sub>) (Fig. 4A, Fig. S2A, B). We did observe a signal in the apical annuli, but found  
275 AAMT also at the apical end of the parasite and present in forming daughter buds (Fig.  
276 4A, arrowheads). The apical annuli localization was confirmed by co-localization with  
277 AAP4 antiserum, but is not as complete as observed for the AAPs (Fig. 4B). Furthermore,  
278 in extracellular parasites the apical annuli localization changed and we observed a more  
279 diffuse localization somewhat reminiscent of the IMC sutures, in particular the transverse  
280 sutures (Fig. 4C). These data indicate that the apical annuli could be a signaling platform  
281 associated with the transition between the intracellular and extracellular states of the  
282 tachyzoite.

283

#### 284 *5. The apical annuli components form differently sized concentric rings*

285 Immuno-electron microscopy of Centrin2 revealed that the signals in individual annuli  
286 were 200 nm diameter rings (i.e. annuli) (Hu *et al.*, 2006). By conventional wide field  
287 microscopy we observed some of the AAP signals as ring-like whereas others appear as  
288 solid dots suggestive of sub-domains in the annuli (Fig. 2B). To further resolve the  
289 architecture of the annuli we applied super-resolution structural illumination microscopy

290 (SR-SIM). As seen in Figure 5A and Movie S1, 2, we observed signals of different size  
291 and shape for the AAPs and Centrin2. Measuring the diameters of individual annuli lead  
292 to the resolution of three groups with statistically different diameters (Fig. 5B). The  
293 widest diameter of 394 nm was observed for AAP4, followed by 305 nm for the  
294 combination of AAP5 and Centrin2, 255 nm for AAP3 and 202 nm for AAP2. With this  
295 SR-SIM approach we resolved clearly visible ring-like signals for AAP4 and Centrin2.  
296 The AAP4 signal appears to have a squarish shape with accumulation on four corners.  
297 However, we cannot exclude potential distortion caused by the SR-SIM image processing  
298 or parasite fixation and are cautious to draw a firm conclusion based on these images.  
299 Ring-like structures were inconsistent for AAP3 and AAP2, but we found examples even  
300 for the smallest of the AAPs, AAP2 (Fig. 5C). Moreover, AAP2-Myc<sub>3</sub> co-localization  
301 with AAP4 antiserum displayed that AAP2 indeed resides within the AAP4 ring (Fig.  
302 5C). To further characterize AAPs in the parasite, we co-localized AAP4 with ISC2, a  
303 previously described component of the IMC sutures (Chen et al., 2015). This co-  
304 localization showed AAP4 signal apical to ISC2, where the IMC borders the apical cap  
305 (Fig. 5D, Movie S3). Combing our BioID data with the SR-SIM results, we resolved the  
306 annuli as a multilayered assembly that consists of several AAPs of different diameter.  
307 The specific enrichment of structural components of the IMC sutures, seen by BioID (e.g.  
308 TSC1 and 3, ISC2 and 6, ISP1 and 2) shows the integration of the annuli between the  
309 IMC plates at the apical end of the parasite (Fig. 5 E).

310

### 311 *6. The apical annuli contribute to pathogenesis*

312 The fitness scores of the AAP genes in the genome-wide CRISPR screen are between  
313 -1.01 and -1.68, which is suggestive of non-essential functions during the lytic cycle of  
314 *Toxoplasma* (Sidik et al., 2016) (Fig. 3A). However, to directly test the biology of the  
315 annuli we depleted AAP2 and AAP4 as they represent the smallest and largest ring-like  
316 signals, respectively. Furthermore, AAP4 is of particular interest as it harbors the most  
317 functional domains and is the most conserved among the Apicomplexa. We established a  
318 tetracycline-regulatable promoter replacement for AAP2 (cKD), which did not result in  
319 any loss of tachyzoite fitness as assessed by plaque assays (Fig. S4D). For AAP4 we  
320 established a complete gene knockout parasite line (Fig. S5A) and monitored loss of

321 AAP4 using the AAP4 antiserum by IFA and in western blots (Fig. 6A, Fig. S5B). The  
322 AAP4-KO line proliferated significantly slower than the parental line (Fig. 6B-C), and  
323 this proliferation defect was restored upon genetic complementation with the *aap4* gene,  
324 which excludes potential artifacts of genome editing (Fig. 6, Fig. S5). To test the role of  
325 annuli *in vivo*, we infected C57BL/6 mice with AAP4-KO, parental RH $\Delta$ Ku80 (control),  
326 and AAP4-KO complemented parasites. As expected, mice infected with either the  
327 control line or the AAP4-KO complementation succumbed to the infection within 8 days  
328 (Fig. 6C). AAP4-KO infected mice survived acute infection one day longer, until day 9  
329 (Fig. 6C). In a replication experiment using 100 parasites for infection we observed a  
330 similar trend for mice infected with AAP4-KO parasites, surviving infection one day  
331 longer. However, the weight change pattern was comparable to mice infected with  
332 control and AAP4-KO complemented parasites (Fig. S6). Together these results suggest  
333 that the apical annuli have only a minimal role in acute virulence of *Toxoplasma*

334

## 335 Discussion

336 Our interrogation of the apical annuli composition by a proximity-based biotinylation  
337 approach with subsequent statistical analysis using Centrin2 and AAP4 as baits,  
338 identified seven proteins localizing to this structure. We identify four new annuli proteins,  
339 AAP2, AAP3, AAP5, and the AAMT. AAP4 has been previously detected in BioID data  
340 sets of the alveolar suture component ISC4 (Chen et al., 2016), of the conoid (Long et al.,  
341 2017a) and a protein above the conoid, SAS6L (Lentini et al., 2019). Lentini et al. further  
342 co-localized AAP4 with Centrin2 and describe a relationship between Centrin2  
343 knockdown and AAP4 abundance in the parasite (Lentini et al., 2019).

344 Recently, a minor population of TgPI-PLC was also reported to reside on the apical  
345 annuli (Hortua Triana *et al.*, 2018). We did not detect TgPI-PLC in our BioID  
346 experiments, which is presumably due to its dynamics. TgPI-PLC only localizes to the  
347 annuli in extracellular parasites. Interestingly, we identified AAMT as an apical annuli  
348 component only in intracellular parasites, thus exhibiting the exact opposite dynamics of  
349 TgPI-PLC. Furthermore, AAMT is widely conserved across the Apicomplexa, but its  
350 relative fitness score of -1.22 suggests it likely does not fulfill an essential function (Sidik  
351 et al., 2016). This is in contrast to the essential apical complex lysine methyltransferase

352 AKMT (Heaslip *et al.*, 2011), which localizes to the conoid and is released into the  
353 cytoplasm to activate gliding motility (Jacot *et al.*, 2016). Further work is required to  
354 assess if AAMT participates to this process, as the localization dynamics of both  
355 methyltransferases are similar. The genome-wide CRISPR/Cas9 screen throughout three  
356 lytic cycles further indicates that none of the AAPs significantly affects parasite fitness  
357 (Sidik *et al.*, 2016). We indeed observed no fitness defect in AAP2-depleted parasites.  
358 And although parasites devoid of AAP4 have decreased fitness *in vitro*, acute virulence is  
359 only minimal affected as indicated by our *in vivo* experiments. Further work is needed to  
360 assess whether the various AAPs have redundant functions in maintaining annuli  
361 structure and/or function.

362 Our data define the previously unknown architecture of the apical annuli from three  
363 different perspectives: 1. the concentric rings observed by super-resolution microscopy; 2.  
364 the BioID approach, that identified several alveolar suture proteins; 3. the domains  
365 contained in the AAP proteins. Previous immunoelectron microscopy on Centrin2  
366 reported a diameter of about 200 nm for individual annuli (Hu *et al.*, 2006). By SR-SIM  
367 we came to a Centrin2 diameter of about 300 nm, a difference that could be attributed to  
368 variations in the fixation method and/or the size and placement of eGFP (Hu *et al.*, 2006)  
369 vs. Myc-epitope tag (this study). We consistently used the same tag and same imaging  
370 method on intracellular parasites; therefore, our data is consistent along all analyzed  
371 AAPs in this regard. AAP2 forms the smallest structure (~200 nm) with AAP3 (~250 nm)  
372 and AAP5/Cen2 (300 nm) in between and AAP4 at the upper end of the scale (~400 nm)  
373 (Fig 5E). The smaller AAP2 and AAP3 ring-like openings were not consistently observed.  
374 This may be a result of the angle the annuli were imaged at or because their diameter  
375 being near the resolution limit. However, we cannot exclude the alternative explanation  
376 that the annuli opening might be dynamic depending on the conditions, with Centrin2  
377 providing a robust candidate for the contractile force (Hu, 2008). Obtaining consistent  
378 images of AAP1 on the annuli was challenging, suggesting AAP1 might not be tightly  
379 associated with the annuli. The putative rod-forming domain repeats in AAP1 likely  
380 serve a structural function, but given the relatively weak or peripheral presence in the  
381 annuli suggests it might not be critical for the annuli.

382 Secondly, the BioID data contained several significant IMC localizing proteins like  
383 ISP1 and ISP2, which are palmitoyl-anchored in the cap alveolus and central alveoli,  
384 respectively (Beck *et al.*, 2010). However, most abundant were proteins found in the  
385 sutures between the alveolar plates, which is consistent with the position of the annuli at  
386 the edge of the cap alveolus. Along this line, the first report of TSC1 (named SIP then)  
387 indicated a reasonable level of Centrin2 co-localization at the apical annuli, besides other  
388 suture localizations (Lentini *et al.*, 2015). The localization of AAP4 at the apical edge of  
389 the lateral ISC2 suture signal further pinpoints that the annuli sit right at the intersection  
390 where two lateral alveoli meet the cap alveolus. These data suggest that the annuli are  
391 actually embedded in the sutures, most likely at the intersections between the cap  
392 alveolus and where the 5-6 central alveolar plates meet each other.

393 A suture-embedded annuli model fits with absence of transmembrane domains or  
394 other membrane anchors on the AAP proteins. Our structural analysis highlights the  
395 coiled-coil domains as the key feature in AAPs, with the exception of AAP5. These  
396 domains are typically present in fast evolving proteins (Kuhn *et al.*, 2014) and also found  
397 in centrosomal proteins (e.g. AAP1 was initially identified for its centrosomal protein  
398 features (Suvorova *et al.*, 2015)). In this regard, it is of note that desmosomes in  
399 suprabasal epidermal cells associate with centrosomal proteins and CLIP170 to cortically  
400 organize microtubules (Sumigray & Lechler, 2011). Desmosomes are present in  
401 multicellular organisms and mediate tight interactions between epithelial cells of tissues  
402 exposed to mechanical stress (Garrod & Chidgey, 2008, Thomason *et al.*, 2010,  
403 Nekrasova & Green, 2013). Interestingly, the appearance and composition of the apical  
404 annuli is somewhat reminiscent of desmosome features. Of course, the presence of  
405 Centrin2 further supports the close relationship between the annuli and centrosome. This  
406 parallel between desmosomes and apical annuli suggests a putative structural function for  
407 the annuli, as they are in apposition of both the IMC and subpellicular microtubules.  
408 However, the number of 5-6 annuli does not appear to be geometrically related to the 22  
409 sub-pellicular microtubules and as discussed above fits better with the 5-6 central  
410 alveolar plates.

411 The AAPs are a set of diverse proteins harboring coiled-coil domains with hints of  
412 both structural and signaling functions putatively regulated by extensive phosphorylation.



413 Another glimpse toward their potential function comes from their conservation across the  
414 apicomplexan lineage (Fig 3D). They are narrowly conserved in a subset of the Coccidia  
415 that form cysts (*Hammondia*, *Neospora*, and *Sarcocystis* spp.). Interestingly, our  
416 conservation analysis also identifies AAP homologs in the non-cyst forming,  
417 monoxenous *Cystoispora suis*, however, the absence of cyst-forming capacity is a  
418 secondary loss of this feature (Worliczek *et al.*, 2013). The consistently shared  
419 phenomenon in this sub-group of Coccidia is that they multiply by an internal budding  
420 process (endogeny). This in contrast to most monoxenous Coccidia like the *Eimeria* spp.,  
421 as well as most other Apicomplexa infecting humans or livestock, which multiply by a  
422 cortical budding process dubbed schizogony. A key difference in context of annuli  
423 function is that the cortical cytoskeleton is absent from the mother and is maintained  
424 during endogeny, whereas this is disassembled shortly after host cell invasion in parasites  
425 dividing by schizogony (Anderson-White *et al.*, 2011, Dubey *et al.*, 2017). We  
426 hypothesize that this mother IMC during trophozoite expansion poses an obstacle for  
427 exchange of nutrients and waste products across the plasma membrane with the  
428 extracellular (vacuolar) environment. Thus, the apical annuli could presumably serve a  
429 pore function facilitating efficient exchange across this barrier.

430 In addition to their putative structural and/or pore-forming functions, the annuli might  
431 be a platform for signaling events. Support is found in the differential localization of  
432 TgPI-PLC and AAMT in intracellular and extracellular parasites, and in the presence of  
433 protein domains with a signaling signature found in some of the AAPs. Of note are the  
434 HAMP domain in AAP1, which is a domain typically found in two-component bacterial  
435 sensor and chemotaxis proteins (Schultz *et al.*, 2015) and in eukaryotic histidine kinases  
436 (Defosse *et al.*, 2015), and the cyclic nucleotide binding domain found in AAP2. Both,  
437 cAMP or cGMP, are key molecules in activating the pathways necessary for egress  
438 (Uboldi *et al.*, 2018). The extensive phosphorylation of AAPs could be mediated as well  
439 by PKA or PKG to modulate function of the annuli in different stages of the lytic cycle.  
440 Furthermore, the Rabaptin-like coiled-coil domain in AAP2 and the GGN-like domain in  
441 AAP4 suggest a putative role in vesicular trafficking.

442 Combining all these insights generates a tentative function of the apical annuli as a  
443 (diffusion and/or vesicular trafficking mediated) pore over the IMC during internal



444 budding, and the annuli may serve in addition as a signaling platform during transitions  
445 between the intracellular to extracellular state.

## 446 **Material and Methods**

447

### 448 **Parasites and mammalian cell lines**

449 Transgenic derivatives of the RH strain were maintained in human foreskin fibroblasts  
450 (HFF) as previously described (Roos *et al.*, 1994). Parasite transfections and selections  
451 were done using 1  $\mu$ M pyrimethamine, 20  $\mu$ M chloramphenicol, 20  $\mu$ M 5'-fluo-  
452 2'-deoxyuridine (FUdR), or a combination of 25 mg/ml mycophenolic acid and 50 mg/ml  
453 xanthine (MPA/X).

454

### 455 **Plasmids and parasite strain generation**

456 *Aap* genes were tagged via endogenous 3'-end replacement. The CAT selection cassette  
457 in the tub-YFPYFP(MCS)/sagCAT plasmid (Anderson-White *et al.*, 2011) was replaced  
458 with a DHFR/TS selection cassette and the tub-YFP-YFP section was further replaced  
459 with a triple-Myc-epitope tag via PmeI and AvrII cloning sites (all oligonucleotide  
460 sequences provided in Table S2). Homologous 3'end flanks of a given *aap* gene were  
461 cloned via PmeI and AvrII into the generated plasmid. 50  $\mu$ g of plasmid DNA was  
462 linearized with a restriction enzyme digest (Table S3) before transfection in RH $\Delta$ Ku80  
463 parasites.

464 For endogenous 5'-end tagging of Centrin2 we used a CRISPR-based strategy.

465 Transfection of 40  $\mu$ g of pU6-Universal plasmid (kindly provided by Sebastian Lourido,  
466 Addgene: 52694), carrying a suitable sgRNA (Table S3), resulted in a DNA-double  
467 strand break around the ATG of the gene. The break was repaired by co-transfection of  
468 40  $\mu$ g of a DNA ultramer that had homologous regions at its 5'- and 3'-end, contained a  
469 LoxP recombination-site as well as a tandem Myc-epitope tag. Parasites that integrated  
470 the ultramer were identified by single cell cloning using limiting dilution and IFA.

471 To generate the cytosolic BioID2-YFP control we cloned the *bioid2* coding sequence  
472 (Kim *et al.*, 2016) via BglII and AvrII cloning sites in the tub-YFP-YFP (MCS)/sagCAT

473 plasmid. The tubulin promoter was subsequently replaced with the *morn1* promoter  
474 sequence (Gubbels *et al.*, 2006) via a PmeI/BglII restriction sites.  
475 For endogenous 5'-end tagging of AAP4 with BioID2 we used a previously reported  
476 method that links expression of a selection marker to the integration into a specific gene  
477 locus (selection-linked integration (SLI) (Birnbaum *et al.*, 2017)). Hereto we designed a  
478 plasmid in which the HXGPRT ORF was followed by the sequence of the 2A-like  
479 peptide from *Thosea asigna* virus (T2A; (Szymczak *et al.*, 2004, Straimer *et al.*, 2012)),  
480 followed by the coding sequence for the Ty-epitope tag and the *bioid2* coding sequence.  
481 All parts were assembled using Gibson assembly strategy (NEB). The established  
482 plasmid served as a template for PCR amplification with oligomers that added 35 bp  
483 homologous flanks, surrounding the AAP4 start codon, to the resulting PCR product. A  
484 DNA-double strand break was made through co-transfection of 40 µg of an AAP4-ATG  
485 CRISPR/Cas9 plasmid and parasites were selected using MPA/X for expression of  
486 HXGPRT under the endogenous *aap4* promoter.  
487 AAP2-cKD parasites were generated by cloning a homologous 5'-flank of the ORF via  
488 BglII and NotI restriction sites into a DHFR-TetO7-sag4-Ty plasmid. This plasmid was  
489 linearized with NheI and subsequently transfected in TATiΔKu80 parasites (Sheiner *et al.*,  
490 2011).  
491 AAP4-KO parasites were generated using a CRISPR-based strategy. Two pU6 plasmids  
492 (20 µg of DNA for each), carrying sgRNAs directed against the 5' and 3' end of the *aap4*  
493 ORF, were transfected in RHΔKu80 parasites, together with a DHFR resistance marker  
494 cassette that had 35bp homologous overhangs to the 5'- and 3'-UTRs of the gene. For  
495 genetic complementation of the AAP4-KO, a plasmid that expresses AAP4-Myc<sub>3</sub> under  
496 its endogenous promoter flanked by homologous regions to the 5'- and 3'-UTR of the  
497 *uprt* locus was generated and integrated into the *uprt* locus of AAP4-KO parasites.  
498 Pseudodiploid expression of the Ty-BioID2-Centrin2 fusion-gene was generated by  
499 cloning the pmorn1-Ty-BioID2 sequence via PmeI and AvrII restriction sites in a  
500 previously generated pmorn1-Myc2-Centrin2-DHFR plasmid (Engelberg *et al.*, 2016).  
501 To co-localize AAP4 with Ty-tagged Centrin2, a plasmid was used that contains a 2500  
502 bp flank upstream of the Centrin2 ORF, the Ty-tagged Centrin2 ORF flanked by loxP  
503 sites and a 2500 bp flank downstream of the Centrin2 stop codon. All parts were cloned

504 into the previously described plasmid for Cre loxP-based recombination (Andenmatten *et*  
505 *al.*, 2012) and 20 µg of plasmid DNA was transfected in AAP4-Myc<sub>3</sub> expressing  
506 parasites.

507

### 508 **BioID sample preparation and mass spectrum analysis**

509 Biotin labeling for Ty-BioID2-Centrin2 and Ty-BioID2-AAP4 cell lines was done in two  
510 biological replicates (+biotin condition) and one biological replicate (-biotin condition).

511 Each biological replicate was run as two technical replicates on the mass spectrometer.

512 The cytosolic BioID2-YFP control was done as one technical replicate for the (+) and (-)  
513 biotin condition.

514 Parasites expressing BioID2-fusion proteins were grown overnight ± 150 µM biotin and  
515 harvested by mechanical lysis in 1% SDS in resuspension buffer (150 mM NaCl, 50 mM

516 Tris-HCl pH 7.4). For the streptavidin pull-down, 1.5 mg of total protein lysate was

517 cleared by centrifugation and mixed with Streptavidin-agarose beads (Fisher) in 1% SDS

518 in DPBS (Corning). Beads and lysates were incubated overnight at 4°C and proteins

519 bound on beads were washed the next day with 0.1% SDS in DPBS, DPBS and H<sub>2</sub>O.

520 Beads were resuspended in 6 M Urea in DPBS, reduced, alkylated and digested with 2 µg

521 of Trypsin (Promega) overnight at 37°C. Digested peptides were separated from beads by

522 centrifugation and subsequent mass-spectrometric analysis was performed.

523 LC-MS/MS analysis was performed on an LTQ-Orbitrap Discovery mass spectrometer

524 (ThermoFisher) coupled to an Agilent 1200 series HPLC. Samples were pressure loaded

525 onto a 250 µm fused silica desalting column packed with 4 cm of Aqua C18 reverse

526 phase resin (Phenomenex). Peptides were eluted onto a biphasic column (100 µm fused

527 silica column with a 5 µm tip packed with 10 cm Aqua C18 resin and 4 cm Partisphere

528 strong cation exchange resin (SCX, Whatman)) using a gradient of 5-100% Buffer B in

529 Buffer A (Buffer A: 95% water, 5% acetonitrile, 0.1% formic acid; Buffer B: 20% water,

530 80% acetonitrile, 0.1% formic acid). Peptides were then eluted from the SCX resin onto

531 the Aqua C18 resin and into the mass spectrometer using four salt steps (95% water, 5%

532 acetonitrile, 0.1% formic acid and 500 mM ammonium acetate) ((Weerapana *et al.*,

533 2007)). The flow rate through the column was set to ~0.25 µL/min and the spray voltage

534 was set to 2.75 kV. With dynamic exclusion enabled, one full MS scan (FTMS) (400-

535 1,800 MW) was followed by 7 data dependent scans (ITMS) of the *n*th most abundant  
536 ions.

537 The tandem MS data were searched using the SEQUEST algorithm ((Eng *et al.*, 1994))  
538 using a concatenated target/decoy variant of the *Toxoplasma gondii* GT1 ToxoDB-V29  
539 database. A static modification of +57.02146 on cysteine was specified to account for  
540 alkylation by iodoacetamide. SEQUEST output files were filtered using DTASelect 2.0  
541 ((Tabb *et al.*, 2002)). Reported peptides were required to be unique to the assigned  
542 protein (minimum of two unique peptides per protein) and discriminant analyses were  
543 performed to achieve a peptide false-positive rate below 5%.

544

#### 545 **Analysis of mass-spec data by probabilistic calculation of interactions**

546 Spectral counts of unique proteins were used to determine probability of interaction for  
547 given bait and preys using SAINTexpress (Teo *et al.*, 2014). SAINTexpress was executed  
548 using the -L4 argument, compressing the four largest quantitative control values of a  
549 given prey in one virtual control. The resulting SAINTexpress matrix was visualized  
550 using the Prohits-viz online suite (Knight *et al.*, 2017) with the following settings:  
551 abundance column set to “spectral sum [SpecSum]”, score column set to “average  
552 probability [AvgP]”, primary filter = 0.8, secondary filter = 0.6, to generating the dot plot  
553 and the prey-prey correlation. The following preys were manually deleted from the  
554 analysis using the Zoom function in Prohits-viz: HXGPRT, TGGT1\_269600 (annotated  
555 as biotin enzyme), TGGT1\_289760 (annotated as biotin-synthase). An output of the dot  
556 plot analysis with relaxed settings (primary filter: 0.5; secondary filter: 0.3) was used to  
557 visualize the interaction network with Cytoscape\_v3.6.1 (Koh *et al.*, 2012, Saito *et al.*,  
558 2012, Shannon *et al.*, 2003).

559

#### 560 **AAP4 and IMC3 antiserum generation**

561 To generate N-terminal His<sub>6</sub> tagged fusion protein, 1143 bp from the cDNA of AAP4  
562 (corresponding to amino acids: 121 to 500) were PCR amplified using the primers  
563 pAVA0421-AAP4-FR and cloned into the pAVA0421 plasmid (Alexandrov *et al.*, 2004)  
564 by Gibson Assembly (NEB). The fusion protein was expressed in BL21 Codon Plus  
565 (DE3) RIPL *Escherichia coli* (Agilent) using 0.5 mM IPTG in 2xYT broth 5 hrs at 37°C

566 and purified under native condition over Ni-NTA Agarose (Invitrogen). Polyclonal  
567 antiserum was generated by immunization of a guinea pig (Covance, Denver, PA).  
568 Antisera were affinity purified as previously described (Gubbels et al., 2006) against  
569 recombinant His<sub>6</sub>-AAP4(121-500).  
570 His<sub>6</sub>-TgIMC3(N1-120) was expressed as described before (Anderson-White et al., 2011)  
571 and polyclonal serum was generated by immunization of a rabbit (Covance, Denver, PA).  
572

### 573 **(Immuno-) fluorescence microscopy**

574 Indirect immunofluorescence assays were performed on intracellular parasites grown  
575 overnight in 6-well plate containing coverslips confluent with HFF cells fixed with 100%  
576 methanol (unless stated otherwise) using the following primary antisera: mouse  $\alpha$ -Ty  
577 clone BB2 (1:500); kindly provided by Sebastian Lourido, Whitehead Institute, MAb  
578 9E10  $\alpha$ -cMyc (1:50); Santa Cruz Biotechnology, MAb 9B11  $\alpha$ -cMyc Alexa488  
579 conjugated (1:100); Cell Signaling Technologies, rabbit  $\alpha$ -beta tubulin (1:1,000); kindly  
580 provided by Naomi Morrisette, University of California, Irvine (Morrisette & Sibley,  
581 2002), rat  $\alpha$ -IMC3 (1:2,000 (Anderson-White et al., 2011)), rabbit  $\alpha$ -IMC3 (1:2,000), rat  
582  $\alpha$ -ISC2 (1:1000); kindly provided by Peter Bradley, University of California, Los  
583 Angeles (Chen et al., 2016)) and guinea pig  $\alpha$ -AAP4 (1:200). Streptavidin-594 (1:1000);  
584 Thermo Fisher, Alexa 488 (A488) or Alexa594 (A594) conjugated goat  $\alpha$ -mouse,  $\alpha$ -  
585 rabbit,  $\alpha$ -rat, or  $\alpha$ -guinea pig were used as secondary antibodies (1:500); Invitrogen. DNA  
586 was stained with 4',6-diamidino-2-phenylindole (DAPI). A Zeiss Axiovert 200 M wide-  
587 field fluorescence microscope was used to collect images, which were deconvolved and  
588 adjusted for phase contrast using Volocity software (Improvision/Perkin Elmer). SR-  
589 SIM or Zeiss Airyscan imaging was performed on intracellular parasites fixed with 4%  
590 PFA in PBS and permeabilized with 0.25% TX-100 or fixed with 100% methanol.  
591 Images were acquired with a Zeiss ELYRA S.1 and Airyscan system in the Boston  
592 College Imaging Core in consultation with Bret Judson. All images were acquired,  
593 analyzed and adjusted using ZEN software and standard settings. Final image analyses  
594 were made with FIJI software.

595

596

597 **Western Blot**

598 Parasites for western blots were filtered through 3  $\mu$ m filters, washed in 1xPBS before  
599 lyzed in resuspension buffer (50mM Tris-HCl, pH 7.8, 150 mM NaCl, 1% SDS and 1x  
600 protease inhibitor cocktail (Sigma Aldrich)) and incubated at 95°C for 10 min. Parasites  
601 at 10 million/lane were loaded and analyzed by SDS-PAGE. Nitrocellulose blots were  
602 probed with MAb 9E10  $\alpha$ -cMyc-HRP (1:4000); Santa Cruz Biotechnology, mouse  $\alpha$ -Ty  
603 clone BB2 (1:5000), guinea pig  $\alpha$ -AAP4 (1:1000), mouse  $\alpha$ -GFP (1:2000); Roche, or  
604 Streptavidin-HRP (1:4000); Thermo Fisher. Secondary antibodies were conjugated to  
605 HRP and used in dilutions of 1:10000 (goat  $\alpha$ -mouse, Dako) and 1:3000 (goat  $\alpha$ -guinea  
606 pig, Santa Cruz Biotechnology). Equal loading was detected with MAb 2 28 33  $\alpha$ -beta-  
607 tubulin (1:5000); Invitrogen.

608

609 ***In vivo* mouse infection studies**

610 Groups of four C57BL/6J mice with a weight between 18-20 g were infected  
611 intraperitoneally with 100 or 1,000 tachyzoites of the RH $\Delta$ Ku80 or AAP4-KO and  
612 AAP4-KO complemented strains. Following infection, mice were monitored daily for  
613 posture, activity level and weight. All animal protocols were approved by the Institutional  
614 Animal Care and Use Committee (IACUC) of Boston College.

615

616 **Acknowledgements**

617 We thank Bret Judson and the Boston College Imaging Core for infrastructure and  
618 support, Emily Stoneburner for technical support, Drs. Bradley, Lourido, Morrissette, and  
619 Ward for sharing reagents.

620 This study was supported by National Science Foundation (NSF) Major Research  
621 Instrumentation grant 1626072, NSF Research Experience for Undergraduates (REU)  
622 grant 1560200, National Institute of Health grants AI144856, AI110690, AI110638, and  
623 AI128136, a Deutsche Forschungsgemeinschaft grant, and an American Heart  
624 Association post-doctoral fellowship grant 17POST33670577. The funders had no role in  
625 study design, data collection and analysis, decision to publish, or preparation of the  
626 manuscript.

627



628 **Conflict of interest**

629 The authors have no conflict of interest to declare.

630

631 **Figure legends**

632 **Figure 1. Protein-protein interaction (PPI) network analysis of the apical annuli.**

633 **A.** Episomal expressed Ty-BioID2-Centrin2 localizes predominantly to the apical annuli  
634 (arrows) but also to the pre-conoidal ring, the centrosome and the basal complex.  
635 Application of 150  $\mu$ M biotin overnight facilitates biotinylation as detected with  
636 Streptavidin-594 (biotinylated proteins, red). Endogenous biotinylation of apicoplast  
637 proteins is always detected with Streptavidin (asterisks). **B.** Endogenously triple Myc-  
638 tagged (Myc<sub>3</sub>) TGGT1\_230340 localizes towards the apical end of the parasites in 5-6  
639 puncta. Parasites were co-stained with beta-tubulin (red) to highlight the parasite's  
640 periphery. **C.** Airyscan imaging of TGGT1\_230340 Myc<sub>3</sub>-tagged parasites transiently  
641 expressing Ty-Centrin2 (red). TGGT1\_230340 only co-localizes with Centrin2 at the  
642 apical annuli and is not present in other subcellular Centrin2 localizations. Due to its  
643 localization we named TGGT1\_230340 apical annuli protein 4 (AAP4). **D.** AAP4 was  
644 endogenously tagged with Ty-BioID2 at the N-terminus (see Fig. S1E). Upon application  
645 of 150  $\mu$ M biotin, increased biotinylation of the apical annuli can be detected by  
646 Streptavidin staining (biotinylated proteins, red). Endogenously biotinylated proteins of  
647 the apicoplast are always detected (asterisks). Blue: DAPI stain. **E.** PPI networks were  
648 modeled by calculating probabilistic bait-prey interactions using SAINTexpress (Lambert  
649 et al., 2015) and plotted with Cytoscape (Saito et al., 2012, Shannon et al., 2003) in a  
650 ball-and-stick model. Preys with an AvgP (average individual probability for  
651 SAINTexpress analysis)  $\geq 0.5$  are shown for each bait. **F.** The statistical support for the  
652 core protein set of the apical annuli is shown as a dot plot generated with ProHits-viz  
653 (Knight et al., 2017). Note that the relative abundance compares between the two samples  
654 and not within an individual sample (e.g. AAP4 was one of the most abundant proteins  
655 identified in Centrin2 BioID data, but compared to the number of spectra in the AAP4  
656 data set it deceptively appears to be relatively low abundant in the Centrin2 data set).  
657 Also note that AAP2 is present in the AAP4 BioID data set and TSC1 and TSC3 in the  
658 Centrin2 BioID data set, but only with low AvgP scores ( $< 0.2$ ). AvgP: average



659 individual probability for SAINTexpress analysis, SpecSum: sum of all spectra for an  
660 individual protein. **G.** The data set was further assembled into a prey-prey correlation  
661 map showing the apical annuli core set. The distance between individual preys is  
662 expressed by color, Black indicates correlating preys, non-correlating preys are shown in  
663 white. See Table S1 for the complete data.

664

665 **Figure 2. Localization and dynamics of the apical annuli proteins (AAPs).** **A.** AAP  
666 genes were endogenously tagged with a triple Myc-epitope tag (Myc<sub>3</sub>) and co-localized  
667 with a specific antisera that recognizes AAP4. Images were acquired on the Airyscan  
668 system. Yellow arrows indicate cross-reactive signal seen with the AAP4 antiserum close  
669 to the nucleus (see also Fig 6A and Fig S5B). **B.** Protein dynamics of identified AAPs  
670 were further followed along the intracellular division cycle of the tachyzoite. The  
671 periphery of the parasite is visualized with Tg- $\beta$ -tubulin antiserum staining (red).  
672 Arrowheads in the middle plane indicate annuli presence in early daughter buds. All  
673 AAPs are present in late daughter buds when the mother's cytoskeleton is being degraded.  
674 Blue: DAPI stain. **C.** AAPs localize to the apical annuli in extracellular parasites,  
675 although AAP5 only exhibits a weak signal.

676

677 **Figure 3. Annotation and sequence analysis of the AAPs.** **A.** AAP annotation and  
678 functional data available through ToxoDB.org (Gajria *et al.*, 2008). Fitness scores  
679 defined by genome-wide CRISPR screen for fitness across three lytic cycles (Sidik *et al.*,  
680 2016). \*In GT1 annotation AAP1 comprises two genes: TGGT1\_242790A (fitness score  
681 0.02, with an extended N-terminus) and TGGT1\_242790B (fitness score -1.01). **B.**  
682 Domain annotations of AAP1-5 made through searches on ToxoDB, SMART, and PFam  
683 databases, NCBI Nr PBLAST searches and coiled-coil predictions (coils window size of  
684 28; 100% probability predictions are shown). The long, largely  $\alpha$ -helical domain in  
685 AAP5 is between brackets as this feature is not displayed for AAP1-4, but it is the only  
686 distinguishable feature in AAP5. Phosphorylation sites detected in the tachyzoite  
687 phosphoproteome are marked with vertical ticks (Treeck *et al.*, 2011). The number at the  
688 C-terminus indicates the number of amino acids. **C.** Coils prediction by the coils server  
689 using a window size of 21 overlaid with the PSIPRED predicted  $\alpha$ -helical repeats

690 (ToxoDB) identify 11 repeated regions (y-axis represents 0-100% probability range of  $\alpha$ -  
691 helix or coiled-coil), whose consensus repeat sequence is provided in the logo plot  
692 (Crooks *et al.*, 2004) at the bottom (see also Fig S2). **D.** Conservation of the AAP  
693 proteins throughout the Apicomplexa through BLASTP of the *Toxoplasma* AAPs against  
694 EuPathDB (Aurrecochea *et al.*, 2013) and OrthoMCL (Chen *et al.*, 2006). Colors  
695 represent likelihood of functional conservation based on manual assessment of the quality  
696 and length of sequence alignments and genomic synteny (green: robust ortholog; yellow:  
697 putative ortholog; red: no ortholog). cyst: cyst forming; monox: monoxenic n.h.: no  
698 homology; endo: asexual division by endodyogeny and/or endopolygeny; schizo: asexual  
699 division by schizogony. The absence of tissue cysts in *C. suis* is likely a secondary loss in  
700 this lineage as it is phylogenetically is more closely related to *Toxoplasma* than to  
701 *Sarcocystis* (Carreno *et al.*, 1998).

702

703 **Figure 4. The methyltransferase AAMT localizes to the annuli in intracellular**  
704 **parasites. A.** Endogenously triple-Myc tagged (Myc<sub>3</sub>) AAMT displays apical annuli  
705 localization in mature parasites (top panels, boxed area magnified 2-fold in inset). We  
706 further detected AAMT signal association with the conoid and in forming daughter buds  
707 (lower panels, marked by arrowheads).. **B.** Airyscan imaging of AAMT-Myc<sub>3</sub> parasites  
708 co-localized with AAP4 antiserum (red). White arrows indicate the apical annuli, as  
709 highlighted by AAMT and AAP4 staining. Note that the AAMT localization to the annuli  
710 is not as complete as detected for other AAPs. Yellow arrows indicate cross-reactive  
711 signal seen with the AAP4 antiserum close to the nucleus (see also Fig 6A and Fig S5B).  
712 **C.** In extracellular parasites AAMT re-distributes to the (transverse) IMC sutures but  
713 remains associated with the conoid (asterisks). Tg- $\beta$ -tubulin serum (red) (Morrissette &  
714 Sibley, 2002) highlights the cortical cytoskeleton. Blue: DAPI stain.

715

716 **Figure 5. The apical annuli display a concentric ring architecture. A.** SR-SIM  
717 analysis of endogenously Myc-tagged AAP and Centrin2 parasite lines co-stained with  
718 Tg- $\beta$ -tubulin antiserum (Morrissette & Sibley, 2002). The lower 50% of the imaged stack  
719 was combined into a Z projection for each image. See Supplementary Movies S1 and S2  
720 for a 3D-reconstruction of the entire AAP4 image stack. **B.** Quantification of AAP donuts.

721 Diameters of at least 40 individual annuli were measured for each cell line. Error bars  
722 represent standard deviation. Statistics: paired two-tailed *t*-test analysis indicated that all  
723 signals except AAP5 and Centrin2 ( $p=0.485$ ) are significantly different from each other  
724 ( $p<0.0001$ ). **C.** SR-SIM analysis of C-terminally triple-Myc tagged AAP2 co-stained  
725 with a specific antiserum recognizing AAP4. AAP2 signals, shown to exhibit the smallest  
726 average annuli diameter, were observed as donuts and are embedded by the AAP4 signal.  
727 Image is cropped to the apical section of a tachyzoite. **D.** SR-SIM analysis of C-  
728 terminally triple-Myc tagged AAP4 co-stained with a specific ISC2 antiserum. The  
729 annuli, highlighted by AAP4, localize to the apical end of the IMC sutures (ISC2 signal).  
730 See Supplementary Movie S3 for a 3D-reconstruction of the entire image stack. **E.**  
731 Schematic presentation of the apical annuli architecture incorporating microscopy and  
732 PPI data. PI-PLC interaction is gleaned from (Hortua Triana et al., 2018).

733

734 **Figure 6. Knockout analysis of AAP4 reveals decreased fitness *in vitro* and reduced**  
735 **virulence *in vivo*:** **A.** IFA using specific  $\alpha$ -AAP4 serum (green). White arrowheads  
736 indicate AAP4 signal at the annuli, yellow arrows indicate a cross-reactive signal seen  
737 close to the nucleus (see also Fig S5B). Parasite periphery is shown by  $\alpha$ -IMC3 serum  
738 (red). Blue: DAPI stain. **B.** Representative plaque assays of AAP4-KO parasites after  
739 seven days of growth. AAP4-KO parasites form significantly smaller plaques compared  
740 to control (RH $\Delta$ Ku80) or AAP4-KO complement parasites. **C.** Quantification of plaque  
741 assays. Three biological replicates are shown; 40-80 independent plaques per condition  
742 and experiment were quantified; error bars represent standard deviation; For statistical  
743 analysis an one-way analysis of variance (ANOVA) test was applied and significance  
744 determined with a post-hoc Tukey's honestly significant difference (HSD) test. **D.**  
745 C57BL/J6 mice infected with 1000 AAP4-KO parasites survive one day longer than mice  
746 infected with equal numbers of control (RH $\Delta$ Ku80) or AAP4-KO complemented  
747 parasites. Weight changes relative to the starting day (day 0) are shown for each of the  
748 four mice per group (round symbols). Horizontal bars represent the group average.  
749 Weight change patterns did not show significant differences between the groups, as tested  
750 by one-way ANOVA test. An additional infection experiment with a 100-parasite  
751 inoculum is present in Fig. S6.

752 **References**

753

754 Alexandrov, A., M. Vignali, D. J. LaCount, E. Quartley, C. de Vries, D. De Rosa, J.  
755 Babulski, S. F. Mitchell, L. W. Schoenfeld, S. Fields, W. G. Hol, M. E. Dumont,  
756 E. M. Phizicky & E. J. Grayhack, (2004) A facile method for high-throughput co-  
757 expression of protein pairs. *Mol Cell Proteomics* **3**: 934-938.

758 Andenmatten, N., S. Egarter, A. J. Jackson, N. Jullien, J. P. Herman & M. Meissner,  
759 (2012) Conditional genome engineering in *Toxoplasma gondii* uncovers  
760 alternative invasion mechanisms. *Nat Methods* **10**: 125-127.

761 Anderson-White, B. R., J. R. Beck, C. T. Chen, M. Meissner, P. J. Bradley & M. J.  
762 Gubbels, (2012) Cytoskeleton assembly in *Toxoplasma gondii* cell division. *Int.*  
763 *Rev. Cell Mol. Biol.* **298**: 1-31.

764 Anderson-White, B. R., F. D. Ivey, K. Cheng, T. Szatanek, A. Lorestani, C. J. Beckers, D.  
765 J. Ferguson, N. Sahoo & M. J. Gubbels, (2011) A family of intermediate filament-  
766 like proteins is sequentially assembled into the cytoskeleton of *Toxoplasma*  
767 *gondii*. *Cell Microbiol* **13**: 18-31.

768 Aurecochea, C., A. Barreto, J. Brestelli, B. P. Brunk, S. Cade, R. Doherty, S. Fischer, B.  
769 Gajria, X. Gao, A. Gingle, G. Grant, O. S. Harb, M. Heiges, S. Hu, J. Iodice, J. C.  
770 Kissinger, E. T. Kraemer, W. Li, D. F. Pinney, B. Pitts, D. S. Roos, G.  
771 Srinivasamoorthy, C. J. Stoeckert, Jr., H. Wang & S. Warrenfeltz, (2013)  
772 EuPathDB: the eukaryotic pathogen database. *Nucleic Acids Res* **41**: D684-691.

773 Beck, J. R., I. A. Rodriguez-Fernandez, J. Cruz de Leon, M. H. Huynh, V. B. Carruthers,  
774 N. S. Morrisette & P. J. Bradley, (2010) A novel family of *Toxoplasma* IMC  
775 proteins displays a hierarchical organization and functions in coordinating  
776 parasite division. *PLoS Pathog* **6**: e1001094.

777 Bhate, M. P., K. S. Molnar, M. Goulian & W. F. DeGrado, (2015) Signal transduction in  
778 histidine kinases: insights from new structures. *Structure* **23**: 981-994.

779 Birnbaum, J., S. Flemming, N. Reichard, A. B. Soares, P. Mesen-Ramirez, E. Jonscher, B.  
780 Bergmann & T. Spielmann, (2017) A genetic system to study *Plasmodium*  
781 *falciparum* protein function. *Nat Methods* **14**: 450-456.

782 Chen, A. L., E. W. Kim, J. Y. Toh, A. A. Vashisht, A. Q. Rashoff, C. Van, A. S. Huang,  
783 A. S. Moon, H. N. Bell, L. A. Bentolila, J. A. Wohlschlegel & P. J. Bradley,  
784 (2015) Novel components of the *Toxoplasma* inner membrane complex revealed  
785 by BioID. *MBio* **6**: e02357-02314.

786 Chen, A. L., A. S. Moon, H. N. Bell, A. S. Huang, A. A. Vashisht, J. Y. Toh, A. H. Lin, S.  
787 M. Nadipuram, E. W. Kim, C. P. Choi, J. A. Wohlschlegel & P. J. Bradley,  
788 (2016) Novel insights into the composition and function of the *Toxoplasma* IMC  
789 sutures. *Cell Microbiol.*

790 Chen, C. T. & M. J. Gubbels, (2013) The *Toxoplasma gondii* centrosome is the platform  
791 for internal daughter budding as revealed by a Nek1 kinase mutant. *J Cell Sci*  
792 **126**: 3344-3355.

793 Chen, F., A. J. Mackey, C. J. Stoeckert, Jr. & D. S. Roos, (2006) OrthoMCL-DB:  
794 querying a comprehensive multi-species collection of ortholog groups. *Nucleic*  
795 *Acids Res* **34**: D363-368.

- 796 Choi, H., B. Larsen, Z. Y. Lin, A. Breitreutz, D. Mellacheruvu, D. Fermin, Z. S. Qin, M.  
797 Tyers, A. C. Gingras & A. I. Nesvizhskii, (2011) SAINT: probabilistic scoring of  
798 affinity purification-mass spectrometry data. *Nat Methods* **8**: 70-73.
- 799 Defosse, T. A., A. Sharma, A. K. Mondal, T. Duge de Bernonville, J. P. Latge, R.  
800 Calderone, N. Giglioli-Guivarc'h, V. Courdavault, M. Clastre & N. Papon, (2015)  
801 Hybrid histidine kinases in pathogenic fungi. *Mol Microbiol* **95**: 914-924.
- 802 Deneka, M., M. Neeft, I. Popa, M. van Oort, H. Sprong, V. Oorschot, J. Klumperman, P.  
803 Schu & P. van der Sluijs, (2003) Rabaptin-5alpha/rabaptin-4 serves as a linker  
804 between rab4 and gamma(1)-adaptin in membrane recycling from endosomes.  
805 *EMBO J* **22**: 2645-2657.
- 806 Dubey, R., B. Harrison, S. Dangoudoubiyam, G. Bandini, K. Cheng, A. Kosber, C.  
807 Agop-Nersesian, D. K. Howe, J. Samuelson, D. J. P. Ferguson & M. J. Gubbels,  
808 (2017) Differential Roles for Inner Membrane Complex Proteins across  
809 *Toxoplasma gondii* and *Sarcocystis neurona* Development. *mSphere* **2**.
- 810 Eng, J. K., A. L. McCormack & J. R. Yates, (1994) An Approach to Correlate Tandem  
811 Mass-Spectral Data of Peptides with Amino-Acid-Sequences in a Protein  
812 Database. *J Am Soc Mass Spectr* **5**: 976-989.
- 813 Engelberg, K., F. D. Ivey, A. Lin, M. Kono, A. Lorestani, D. Faugno-Fusci, T. W.  
814 Gilberger, M. White & M.-J. Gubbels, (2016) A MORN1-associated HAD  
815 phosphatase in the basal complex is essential for *Toxoplasma gondii* daughter  
816 budding. *Cell Microbiol* **18**: 1153-1171.
- 817 Firat-Karalar, E. N., N. Rauniyar, J. R. Yates, 3rd & T. Stearns, (2014) Proximity  
818 interactions among centrosome components identify regulators of centriole  
819 duplication. *Curr Biol* **24**: 664-670.
- 820 Florens, L., M. J. Carozza, S. K. Swanson, M. Fournier, M. K. Coleman, J. L. Workman  
821 & M. P. Washburn, (2006) Analyzing chromatin remodeling complexes using  
822 shotgun proteomics and normalized spectral abundance factors. *Methods* **40**: 303-  
823 311.
- 824 Francia, M. E. & B. Striepen, (2014) Cell division in apicomplexan parasites. *Nature*  
825 *reviews. Microbiology* **12**: 125-136.
- 826 Frenal, K., D. Jacot, P. M. Hammoudi, A. Graindorge, B. Maco & D. Soldati-Favre,  
827 (2017) Myosin-dependent cell-cell communication controls synchronicity of  
828 division in acute and chronic stages of *Toxoplasma gondii*. *Nat Commun* **8**: 15710.
- 829 Garrod, D. & M. Chidgey, (2008) Desmosome structure, composition and function.  
830 *Biochim Biophys Acta* **1778**: 572-587.
- 831 Goldman, M., R. K. Carver & A. J. Sulzer, (1958) Reproduction of *Toxoplasma gondii*  
832 by internal budding. *J Parasitol* **44**: 161-171.
- 833 Gonzalez Del Carmen, M., M. Mondragon, S. Gonzalez & R. Mondragon, (2009)  
834 Induction and regulation of conoid extrusion in *Toxoplasma gondii*. *Cell*  
835 *Microbiol* **11**: 967-982.
- 836 Gubbels, M. J. & N. S. Morrissette, (2013) The Cytoskeleton: structures and motility In:  
837 *Toxoplasma gondii*: The Model Apicomplexan. L. M. Weiss & K. Kim (eds).  
838 Amsterdam: Elsevier Academic Press, pp. 455-503.
- 839 Gubbels, M. J., S. Vaishnava, N. Boot, J. F. Dubremetz & B. Striepen, (2006) A MORN-  
840 repeat protein is a dynamic component of the *Toxoplasma gondii* cell division  
841 apparatus. *J Cell Sci* **119**: 2236-2245.



- 842 Gupta, G. D., E. Coyaud, J. Goncalves, B. A. Mojarad, Y. Liu, Q. Wu, L. Gheiratmand,  
843 D. Comartin, J. M. Tkach, S. W. Cheung, M. Bashkurov, M. Hasegan, J. D.  
844 Knight, Z. Y. Lin, M. Schueler, F. Hildebrandt, J. Moffat, A. C. Gingras, B.  
845 Raught & L. Pelletier, (2015) A Dynamic Protein Interaction Landscape of the  
846 Human Centrosome-Cilium Interface. *Cell* **163**: 1484-1499.
- 847 Heaslip, A. T., M. Nishi, B. Stein & K. Hu, (2011) The motility of a human parasite,  
848 *Toxoplasma gondii*, is regulated by a novel lysine methyltransferase. *PLoS*  
849 *Pathog* **7**: e1002201.
- 850 Hortua Triana, M. A., K. M. Marquez-Nogueras, L. Chang, A. J. Stasic, C. Li, K. A.  
851 Spiegel, A. Sharma, Z. H. Li & S. N. J. Moreno, (2018) Tagging of Weakly  
852 Expressed *Toxoplasma gondii* Calcium-Related Genes with High-Affinity Tags. *J*  
853 *Eukaryot Microbiol.*
- 854 Hu, K., (2008) Organizational changes of the daughter basal complex during the parasite  
855 replication of *Toxoplasma gondii*. *PLoS Pathog* **4**: e10.
- 856 Hu, K., J. Johnson, L. Florens, M. Fraunholz, S. Suravajjala, C. DiLullo, J. Yates, D. S.  
857 Roos & J. M. Murray, (2006) Cytoskeletal components of an invasion machine--  
858 the apical complex of *Toxoplasma gondii*. *PLoS Pathog* **2**: e13.
- 859 Jacot, D., N. Tosetti, I. Pires, J. Stock, A. Graindorge, Y. F. Hung, H. Han, R. Tewari, I.  
860 Kursula & D. Soldati-Favre, (2016) An Apicomplexan Actin-Binding Protein  
861 Serves as a Connector and Lipid Sensor to Coordinate Motility and Invasion. *Cell*  
862 *Host Microbe* **20**: 731-743.
- 863 Kim, D. I., K. C. Birendra, W. Zhu, K. Motamedchaboki, V. Doye & K. J. Roux, (2014)  
864 Probing nuclear pore complex architecture with proximity-dependent  
865 biotinylation. *Proc Natl Acad Sci U S A* **111**: E2453-2461.
- 866 Kim, D. I., S. C. Jensen, K. A. Noble, B. Kc, K. H. Roux, K. Motamedchaboki & K. J.  
867 Roux, (2016) An improved smaller biotin ligase for BioID proximity labeling.  
868 *Mol Biol Cell* **27**: 1188-1196.
- 869 Knight, J. D. R., H. Choi, G. D. Gupta, L. Pelletier, B. Raught, A. I. Nesvizhskii & A. C.  
870 Gingras, (2017) ProHits-viz: a suite of web tools for visualizing interaction  
871 proteomics data. *Nat Methods* **14**: 645-646.
- 872 Koh, G. C., P. Porras, B. Aranda, H. Hermjakob & S. E. Orchard, (2012) Analyzing  
873 protein-protein interaction networks. *J Proteome Res* **11**: 2014-2031.
- 874 Kuhn, M., A. A. Hyman & A. Beyer, (2014) Coiled-coil proteins facilitated the  
875 functional expansion of the centrosome. *PLoS computational biology* **10**:  
876 e1003657.
- 877 Lambert, J. P., M. Tucholska, C. Go, J. D. Knight & A. C. Gingras, (2015) Proximity  
878 biotinylation and affinity purification are complementary approaches for the  
879 interactome mapping of chromatin-associated protein complexes. *J Proteomics*  
880 **118**: 81-94.
- 881 Lentini, G., D. J. Dubois, B. Maco, D. Soldati-Favre & K. Frenal, (2019) The roles of  
882 Centrin 2 and Dynein Light Chain 8a in apical secretory organelles discharge of  
883 *Toxoplasma gondii*. *Traffic*.
- 884 Lentini, G., M. Kong-Hap, H. El Hajj, M. Francia, C. Claudet, B. Striepen, J. F.  
885 Dubremetz & M. Lebrun, (2015) Identification and characterization of  
886 *Toxoplasma* SIP, a conserved apicomplexan cytoskeleton protein involved in

- 887 maintaining the shape, motility and virulence of the parasite. *Cellular*  
888 *Microbiology* **17**: 62-78.
- 889 Long, S., B. Anthony, L. L. Drewry & L. D. Sibley, (2017a) A conserved ankyrin repeat-  
890 containing protein regulates conoid stability, motility and cell invasion in  
891 *Toxoplasma gondii*. *Nat Commun* **8**: 2236.
- 892 Long, S., K. M. Brown, L. L. Drewry, B. Anthony, I. Q. H. Phan & L. D. Sibley, (2017b)  
893 Calmodulin-like proteins localized to the conoid regulate motility and cell  
894 invasion by *Toxoplasma gondii*. *PLoS Pathog* **13**: e1006379.
- 895 Lorestani, A., L. Sheiner, K. Yang, S. D. Robertson, N. Sahoo, C. F. Brooks, D. J.  
896 Ferguson, B. Striepen & M. J. Gubbels, (2010) A *Toxoplasma* MORN1 Null  
897 Mutant Undergoes Repeated Divisions but Is Defective in Basal Assembly,  
898 Apicoplast Division and Cytokinesis. *PLoS ONE* **5**: e12302.
- 899 Lu, B. & C. E. Bishop, (2003) Mouse GGN1 and GGN3, two germ cell-specific proteins  
900 from the single gene Ggn, interact with mouse POG and play a role in  
901 spermatogenesis. *J Biol Chem* **278**: 16289-16296.
- 902 Meena, N., H. Kaur & A. K. Mondal, (2010) Interactions among HAMP domain repeats  
903 act as an osmosensing molecular switch in group III hybrid histidine kinases from  
904 fungi. *J Biol Chem* **285**: 12121-12132.
- 905 Morrisette, N. S. & L. D. Sibley, (2002) Disruption of microtubules uncouples budding  
906 and nuclear division in *Toxoplasma gondii*. *J Cell Sci* **115**: 1017-1025.
- 907 Neesen, J., U. A. Heinlein, K. Heinz Glatzer & H. Bunemann, (1999) Proteins with  
908 tandemly arranged repeats of a highly charged 16-amino-acid motif encoded by  
909 the Dhms101 gene family are structural components of the outer sheath of the  
910 extremely elongated sperm tails of *Drosophila hydei*. *Dev Growth Differ* **41**: 93-  
911 99.
- 912 Neesen, J., S. Padmanabhan & H. Bunemann, (1994) Tandemly arranged repeats of a  
913 novel highly charged 16-amino-acid motif representing the major component of  
914 the sperm-tail-specific axoneme-associated protein family Dhms101 form  
915 extended alpha-helical rods within the extremely elongated spermatozoa of  
916 *Drosophila hydei*. *Eur J Biochem* **225**: 1089-1095.
- 917 Nekrasova, O. & K. J. Green, (2013) Desmosome assembly and dynamics. *Trends Cell*  
918 *Biol* **23**: 537-546.
- 919 Nishi, M., K. Hu, J. M. Murray & D. S. Roos, (2008) Organellar dynamics during the cell  
920 cycle of *Toxoplasma gondii*. *J Cell Sci* **121**: 1559-1568.
- 921 Peixoto, L., F. Chen, O. S. Harb, P. H. Davis, D. P. Beiting, C. S. Brownback, D.  
922 Ouloguem & D. S. Roos, (2010) Integrative genomic approaches highlight a  
923 family of parasite-specific kinases that regulate host responses. *Cell Host Microbe*  
924 **8**: 208-218.
- 925 Porchet, E. & G. Torpier, (1977) Freeze fracture study of *Toxoplasma* and *Sarcocystis*  
926 infective stages. *Z Parasitenkd* **54**: 101-124.
- 927 Roos, D. S., R. G. Donald, N. S. Morrisette & A. L. Moulton, (1994) Molecular tools for  
928 genetic dissection of the protozoan parasite *Toxoplasma gondii*. *Methods Cell*  
929 *Biol* **45**: 27-63.
- 930 Roux, K. J., D. I. Kim, M. Raida & B. Burke, (2012) A promiscuous biotin ligase fusion  
931 protein identifies proximal and interacting proteins in mammalian cells. *J Cell*  
932 *Biol* **196**: 801-810.



- 933 Saito, R., M. E. Smoot, K. Ono, J. Ruscheinski, P. L. Wang, S. Lotia, A. R. Pico, G. D.  
934 Bader & T. Ideker, (2012) A travel guide to Cytoscape plugins. *Nat Methods* **9**:  
935 1069-1076.
- 936 Schultz, J. E., K. Kanchan & M. Ziegler, (2015) Intraprotein signal transduction by  
937 HAMP domains: a balancing act. *Int J Med Microbiol* **305**: 243-251.
- 938 Shannon, P., A. Markiel, O. Ozier, N. S. Baliga, J. T. Wang, D. Ramage, N. Amin, B.  
939 Schwikowski & T. Ideker, (2003) Cytoscape: a software environment for  
940 integrated models of biomolecular interaction networks. *Genome Res* **13**: 2498-  
941 2504.
- 942 Sheiner, L., J. L. Demerly, N. Poulsen, W. L. Beatty, O. Lucas, M. S. Behnke, M. W.  
943 White & B. Striepen, (2011) A systematic screen to discover and analyze  
944 apicoplast proteins identifies a conserved and essential protein import factor.  
945 *PLoS Pathog* **7**: e1002392.
- 946 Sidik, S. M., D. Huet, S. M. Ganesan, M. H. Huynh, T. Wang, A. S. Nasamu, P. Thiru, J.  
947 P. Saeij, V. B. Carruthers, J. C. Niles & S. Lourido, (2016) A Genome-wide  
948 CRISPR Screen in Toxoplasma Identifies Essential Apicomplexan Genes. *Cell*  
949 **166**: 1423-1435 e1412.
- 950 Stenmark, H., G. Vitale, O. Ullrich & M. Zerial, (1995) Rabaptin-5 is a direct effector of  
951 the small GTPase Rab5 in endocytic membrane fusion. *Cell* **83**: 423-432.
- 952 Straimer, J., M. C. Lee, A. H. Lee, B. Zeitler, A. E. Williams, J. R. Pearl, L. Zhang, E. J.  
953 Rebar, P. D. Gregory, M. Llinas, F. D. Urnov & D. A. Fidock, (2012) Site-  
954 specific genome editing in Plasmodium falciparum using engineered zinc-finger  
955 nucleases. *Nat Methods* **9**: 993-998.
- 956 Sumigray, K. D. & T. Lechler, (2011) Control of cortical microtubule organization and  
957 desmosome stability by centrosomal proteins. *Bioarchitecture* **1**: 221-224.
- 958 Suvorova, E. S., M. Francia, B. Striepen & M. W. White, (2015) A novel bipartite  
959 centrosome coordinates the apicomplexan cell cycle. *PLoS Biol* **13**: e1002093.
- 960 Szymczak, A. L., C. J. Workman, Y. Wang, K. M. Vignali, S. Dilioglou, E. F. Vanin & D.  
961 A. Vignali, (2004) Correction of multi-gene deficiency in vivo using a single  
962 'self-cleaving' 2A peptide-based retroviral vector. *Nat Biotechnol* **22**: 589-594.
- 963 Tabb, D. L., W. H. McDonald & J. R. Yates, (2002) DTASelect and contrast: Tools for  
964 assembling and comparing protein identifications from shotgun proteomics. *J*  
965 *Proteome Res* **1**: 21-26.
- 966 Teo, G., G. Liu, J. Zhang, A. I. Nesvizhskii, A. C. Gingras & H. Choi, (2014)  
967 SAINTexpress: improvements and additional features in Significance Analysis of  
968 INTERactome software. *J Proteomics* **100**: 37-43.
- 969 Thomason, H. A., A. Scothern, S. McHarg & D. R. Garrod, (2010) Desmosomes:  
970 adhesive strength and signalling in health and disease. *Biochem J* **429**: 419-433.
- 971 Treeck, M., J. L. Sanders, J. E. Elias & J. C. Boothroyd, (2011) The phosphoproteomes  
972 of Plasmodium falciparum and Toxoplasma gondii reveal unusual adaptations  
973 within and beyond the parasites' boundaries. *Cell Host Microbe* **10**: 410-419.
- 974 Uboldi, A. D., M. L. Wilde, E. A. McRae, R. J. Stewart, L. F. Dagley, L. Yang, N. J.  
975 Katris, S. V. Hapuarachchi, M. J. Coffey, A. M. Lehane, C. Y. Botte, R. F. Waller,  
976 A. I. Webb, M. J. McConville & C. J. Tonkin, (2018) Protein kinase A negatively  
977 regulates Ca<sup>2+</sup> signalling in Toxoplasma gondii. *PLoS Biol* **16**: e2005642.

- 978 Weerapana, E., A. E. Speers & B. F. Cravatt, (2007) Tandem orthogonal proteolysis-  
979 activity-based protein profiling (TOP-ABPP) - a general method for mapping sites  
980 of probe modification in proteomes. *Nat Protoc* **2**: 1414-1425.
- 981 Worliczek, H. L., B. Ruttkowski, L. Schwarz, K. Witter, W. Tschulenk & A. Joachim,  
982 (2013) *Isospora suis* in an epithelial cell culture system - an in vitro model for  
983 sexual development in coccidia. *PLoS One* **8**: e69797.
- 984 Zhao, Q., Y. Zhou, Z. Cao, H. Zhu, P. Huang & B. Lu, (2005) Germ-cell specific protein  
985 gametogenetin protein 2 (GGN2), expression in the testis, and association with  
986 intracellular membrane. *Mol Reprod Dev* **72**: 31-39.
- 987
- 988

# Figure 1

bioRxiv preprint doi: <https://doi.org/10.1101/711432>; this version posted July 22, 2019. The copyright holder for this preprint (which was not certified by peer review) is the author/funder, who has granted bioRxiv a license to display the preprint in perpetuity. It is made available under aCC-BY-NC-ND 4.0 International license.

## A

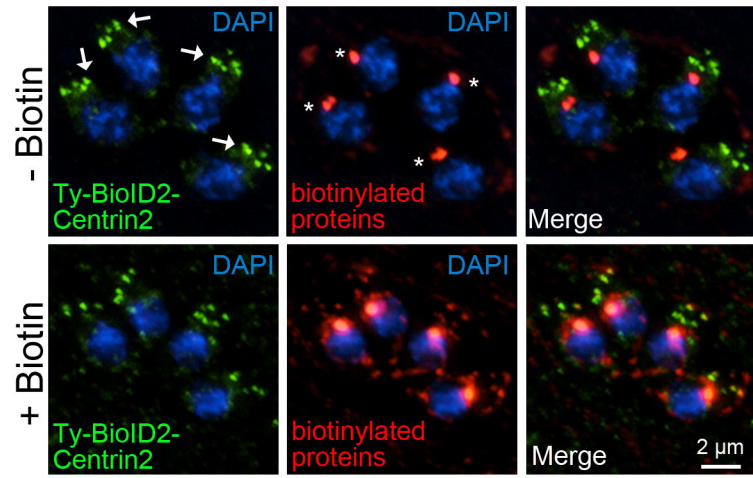

## B

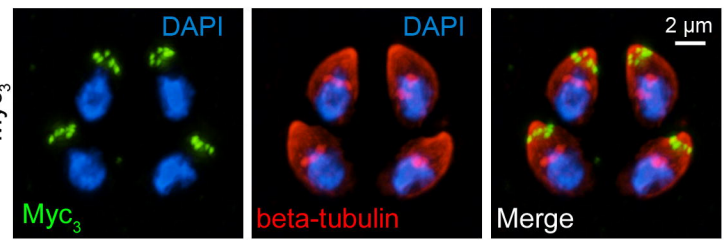

## C

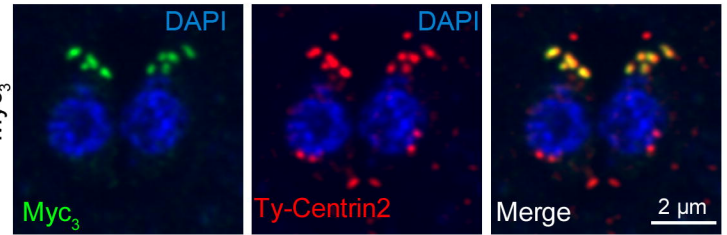

## D

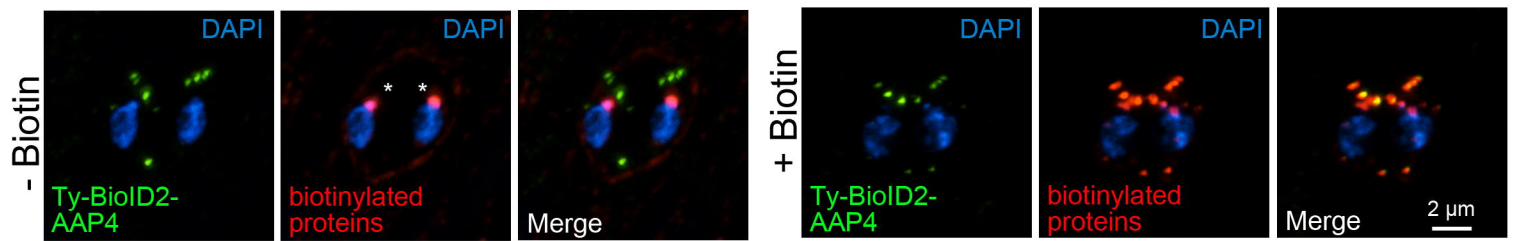

## E

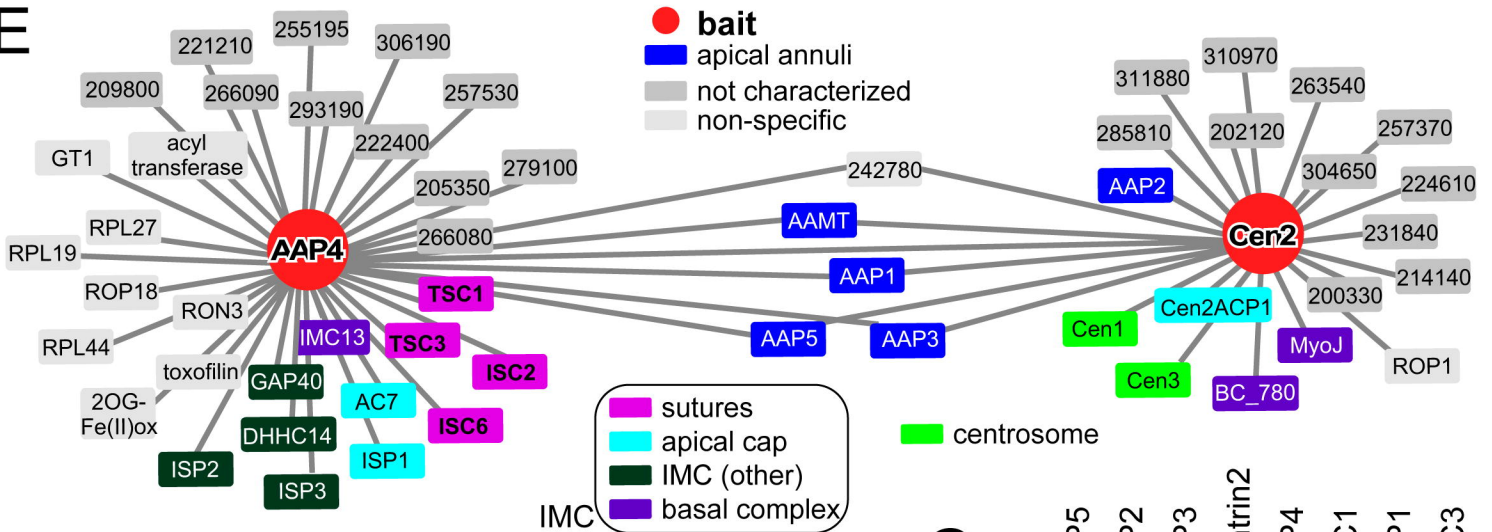

## F

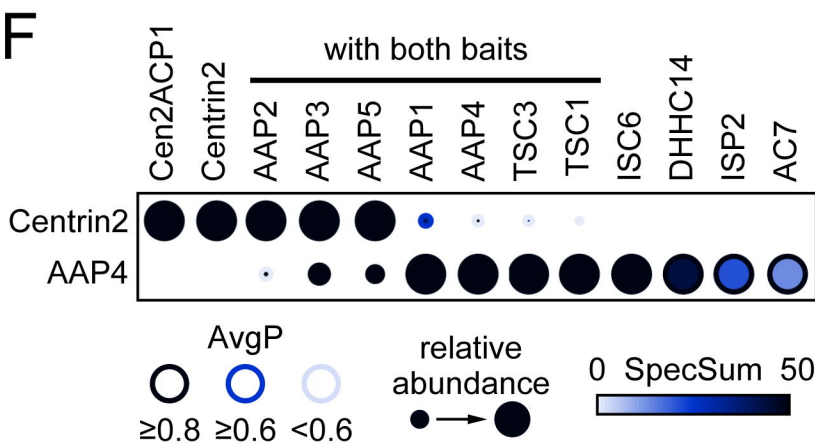

## G

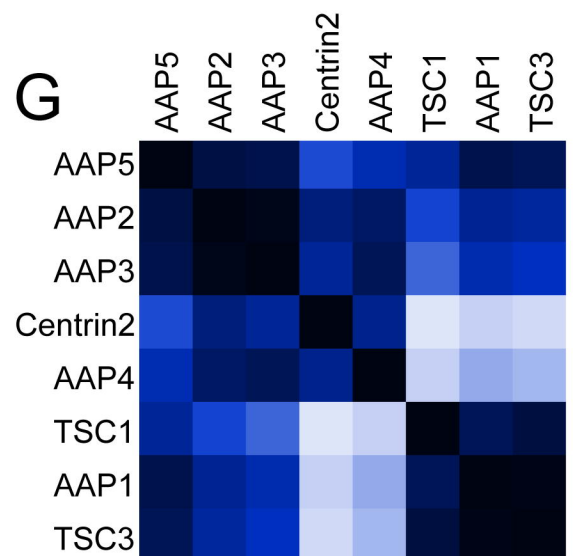



# Figure 2

**A**

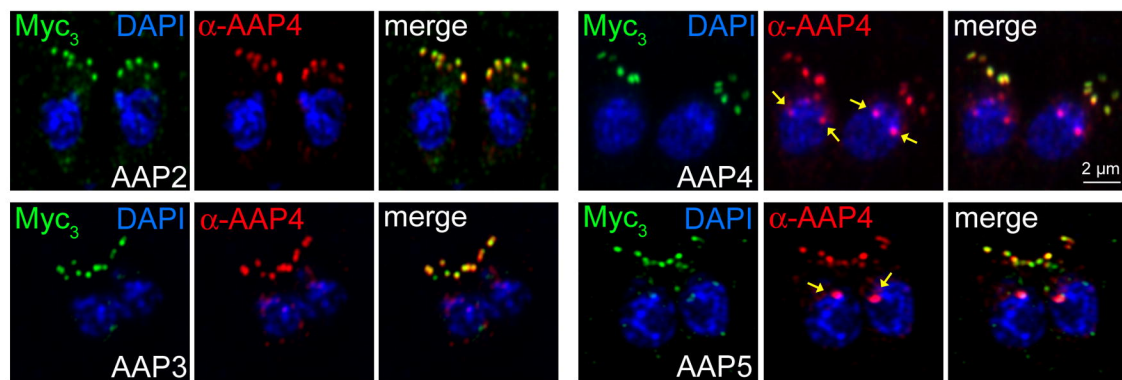

**B**

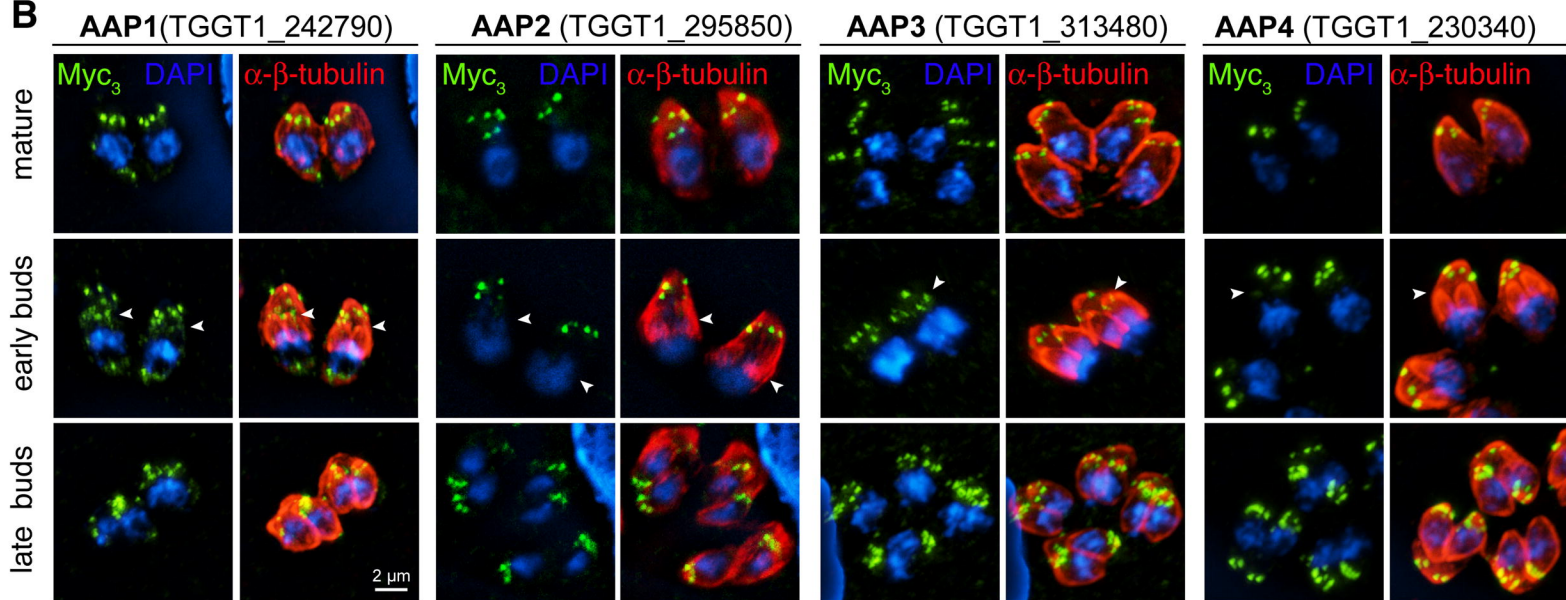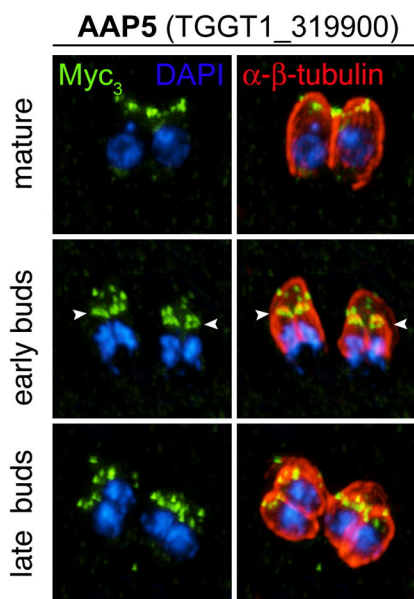

**C**

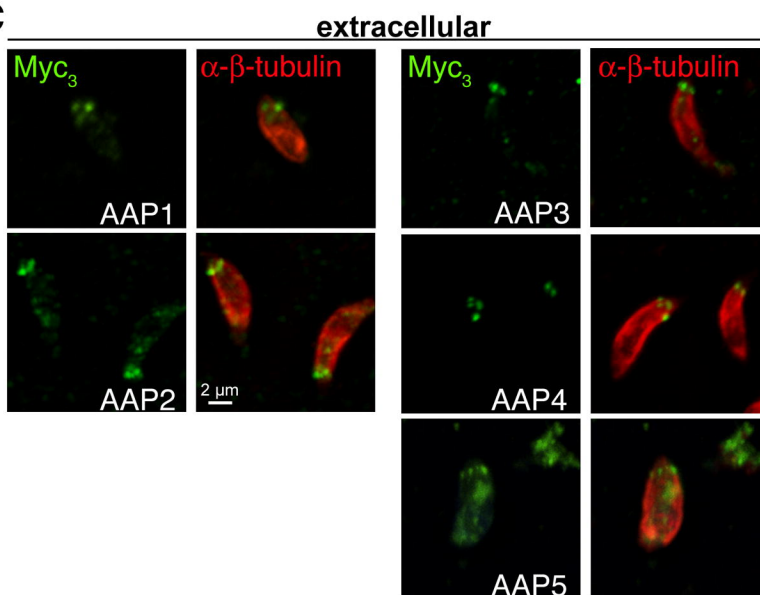

# Figure 3

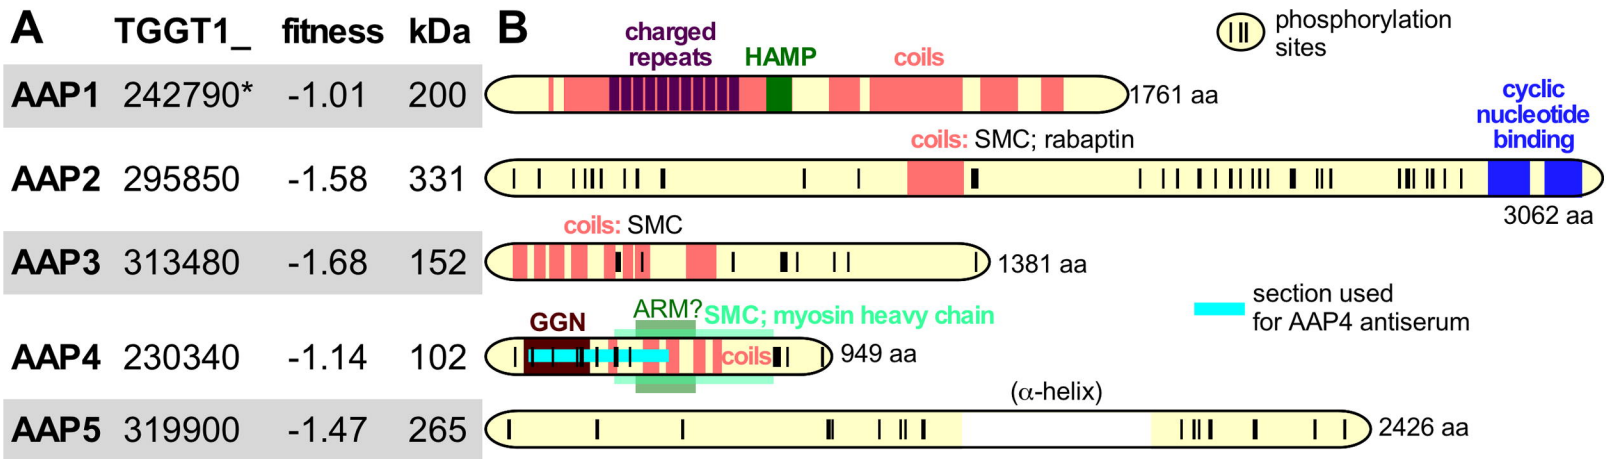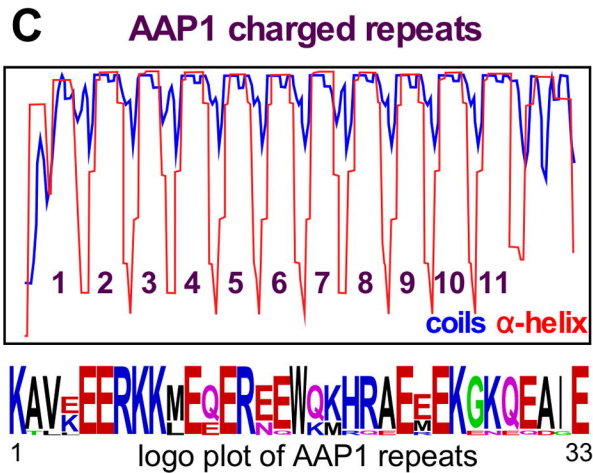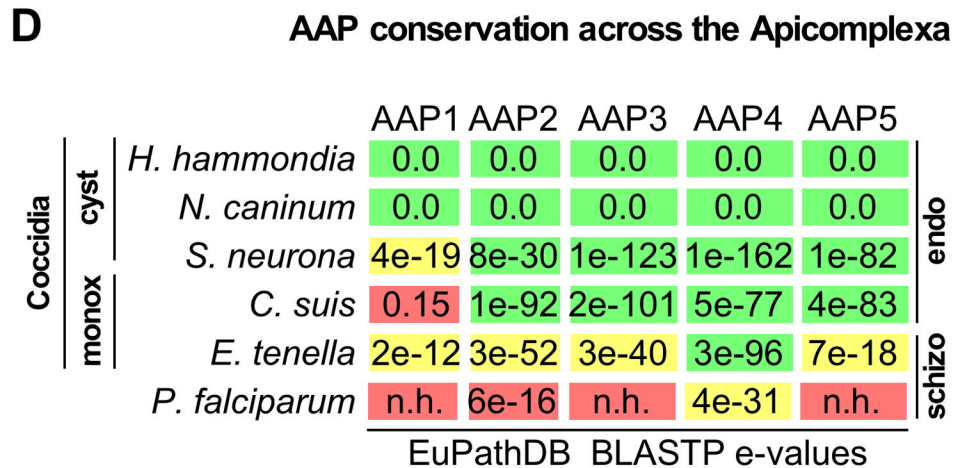

Figure 4

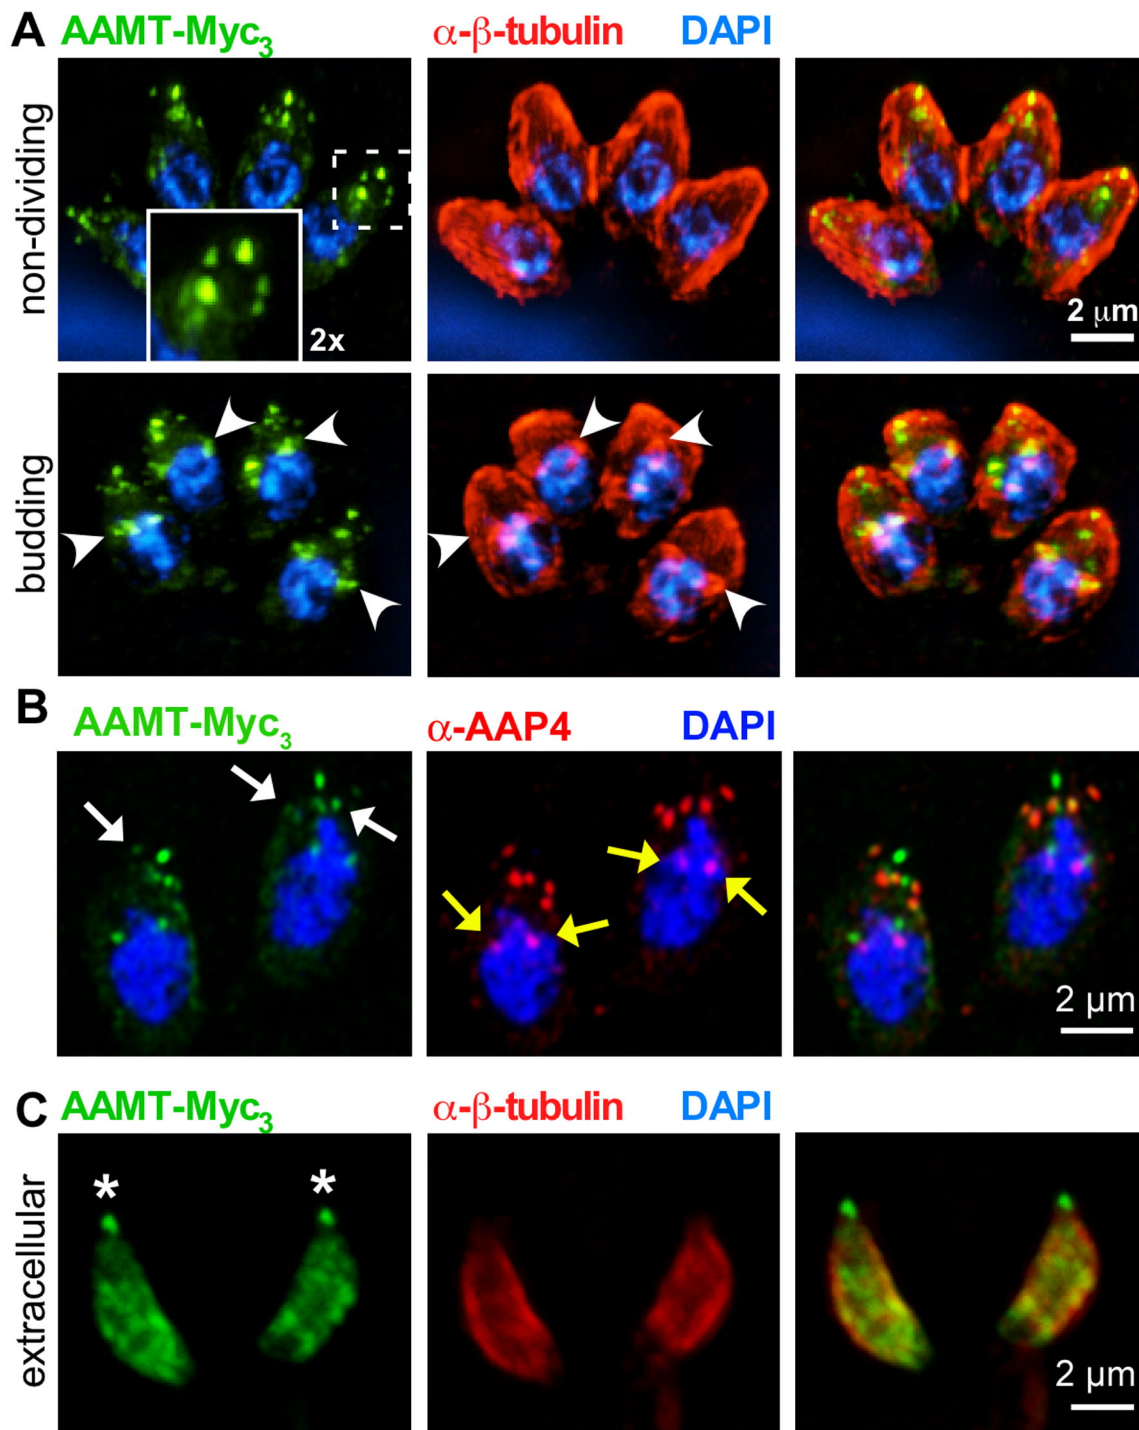



Figure 5

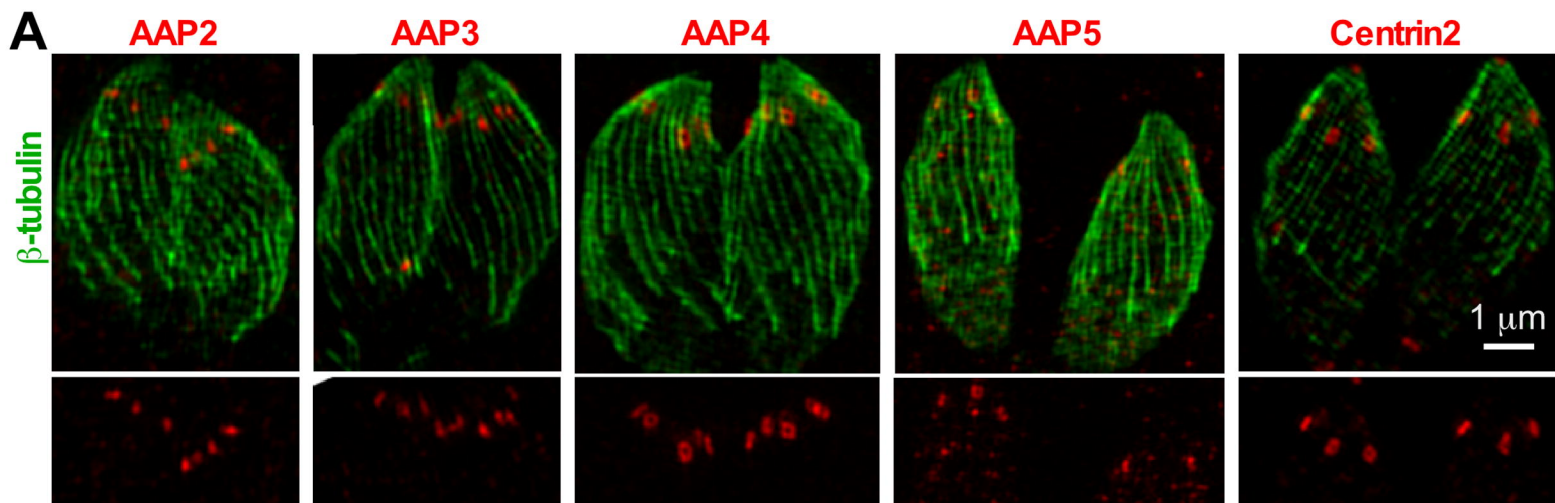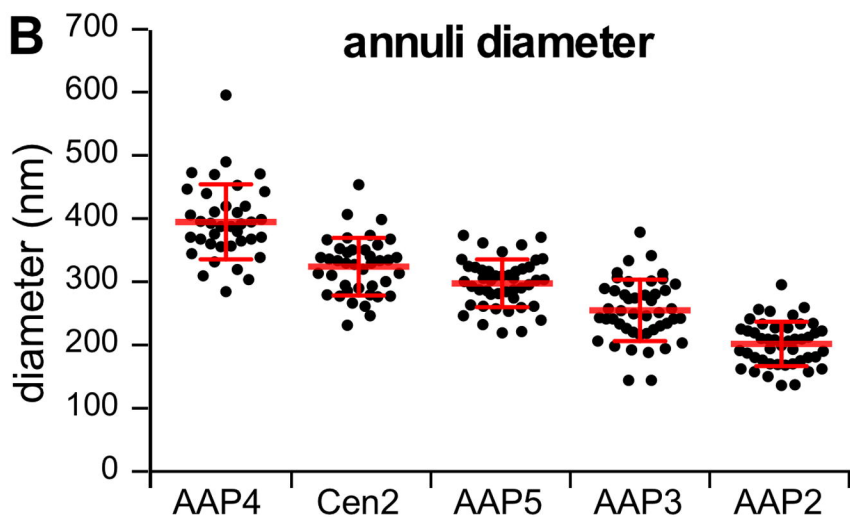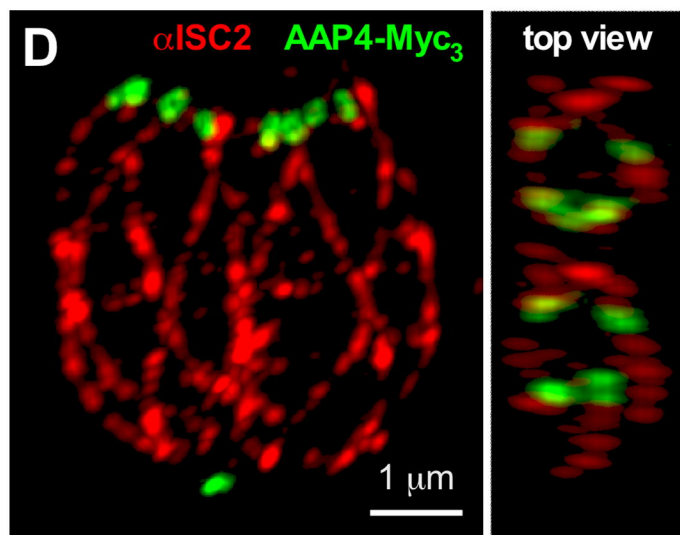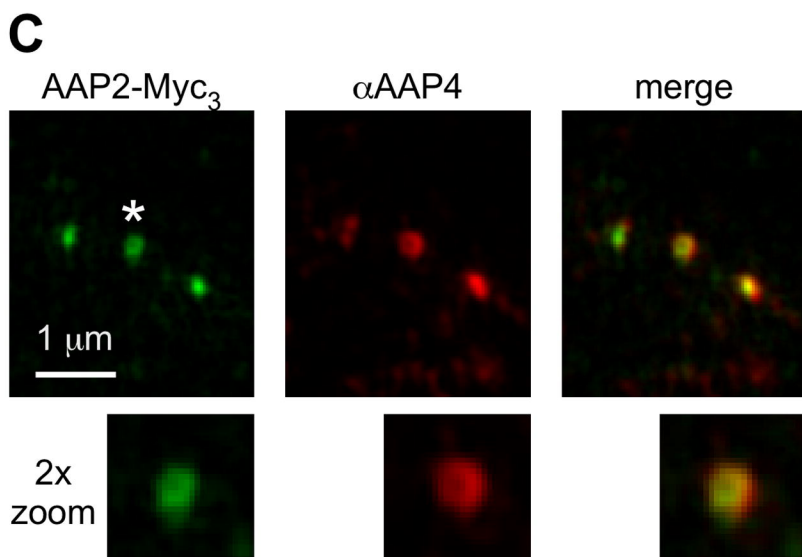

**E** Architecture of the apical annuli

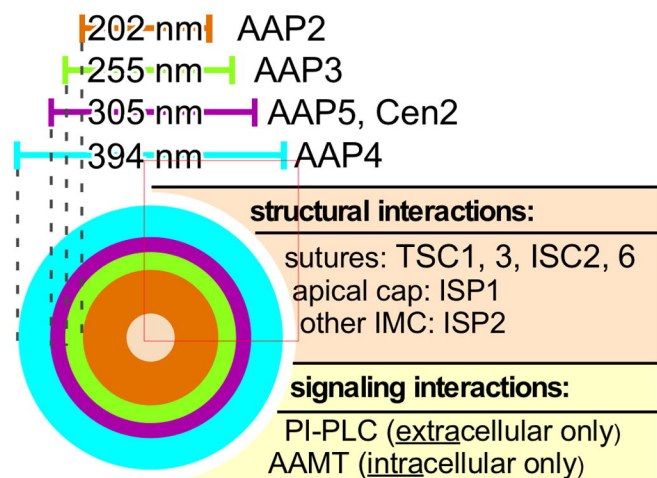



Figure 6

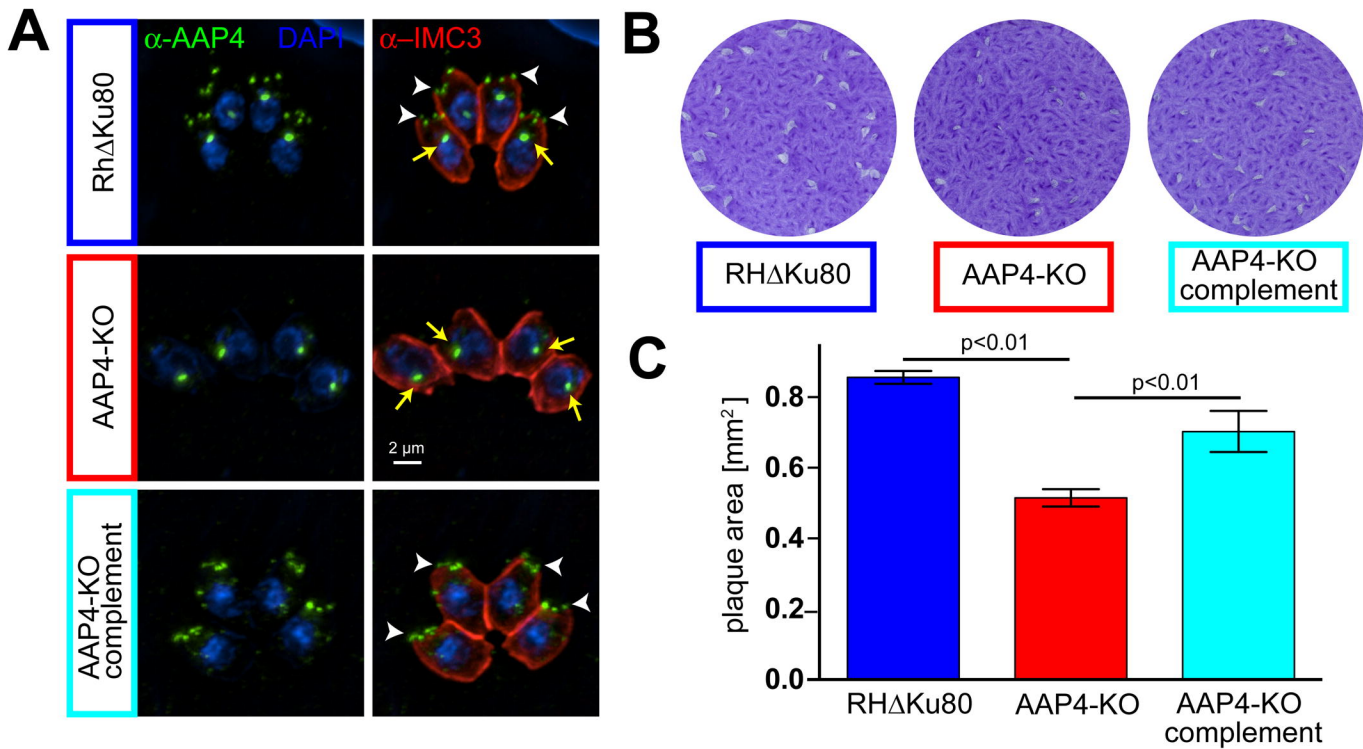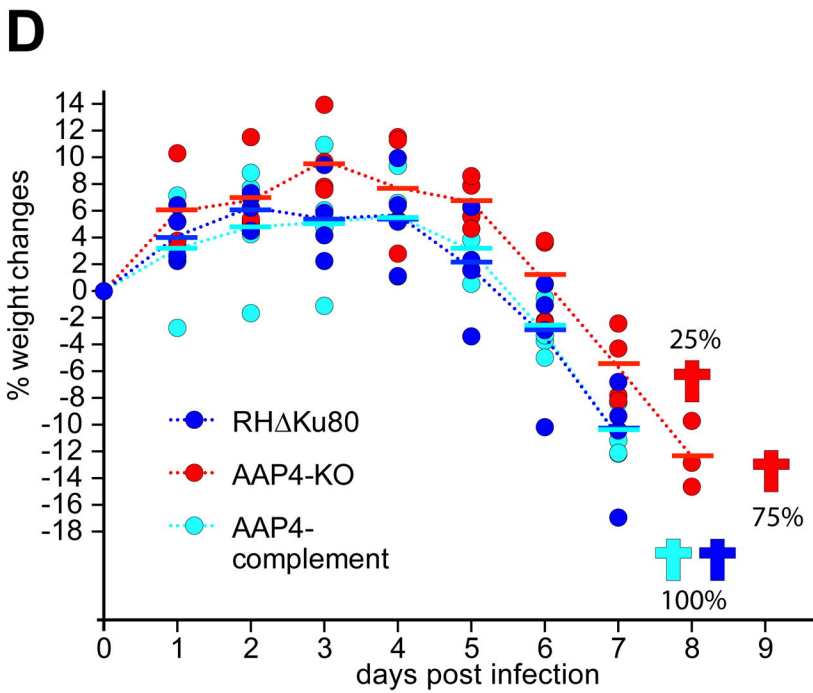

Source: https://www.biorxiv.org/content/10.1101/711432v1.full.pdf
